# Supplementary material for: Electronic transport in radial π-conjugated macrocyclic molecules: a density functional theory study
Source: Royal Society of Chemistry journal article supplement (doi:10.1039/d6ra01456a), 2026-05-11
Supplement: d6ra01456a1.pdf [file d6ra01456a1.pdf]

*Supporting Information for*

**Electronic Transport in Radial  $\pi$ -Conjugated Macrocyclic Molecules: A Density Functional Theory Study**

Sneigitha Govindarajan,<sup>a</sup> Kunchanapalli Ramya,<sup>a</sup> Mahesh Kumar Ravva,<sup>b\*</sup> and Sabyasachi Mukhopadhyay<sup>a\*</sup>

<sup>a</sup>Department of Physics, SRM University-AP, Amaravati, Andhra Pradesh-522240, INDIA

<sup>b</sup>Department of Chemistry, SRM University-AP, Amaravati, Andhra Pradesh-522240, INDIA

Sneigitha Govindarajan, Sabyasachi Mukhopadhyay

E-mail: [sabyasachi.m@srmap.edu.in](mailto:sabyasachi.m@srmap.edu.in)

Mahesh Kumar Ravva

E-mail: [mahesh.r@srmap.edu.in](mailto:mahesh.r@srmap.edu.in)

| <b>S.NO</b> | <b>Contents</b>                                                                                       | <b>Page No</b> |
|-------------|-------------------------------------------------------------------------------------------------------|----------------|
| 1           | Computational procedure protocol                                                                      | 2              |
| 2           | Comparison of SZP and DZP basis sets in modelling metal contacts                                      | 2              |
| 3           | HOMO and LUMO isosurface representation of the macrocyclic molecules                                  | 3              |
| 4           | Comparative Analysis of Gold Nanoclusters and use of Au-18 Marks decahedron clusters over slab models | 5              |
| 5           | Optimized structure of the Au-S distances                                                             | 6              |
| 6           | Cartesian coordinates of the linear and macrocyclic molecules                                         | 7              |
| 7           | Cartesian coordinates of the molecular junctions for the molecules                                    | 19             |
| 8           | Cartesian coordinates of the gold clusters                                                            | 33             |

## **1. Computational procedure protocol**

In this study, we have designed a computational approach to accurately understand electronic and transport properties across thiophene-based macrocycles while maintaining computational efficiency. In the first step, we have designed thiophene-based macrocycles by incorporating D-A moieties such as DPP and BT to assess their effects on transport efficiency across the macrocycles. Further, we have optimized the structures utilizing density functional theory (DFT) with the Gaussian Software package. In this DFT theory, the PBE0 hybrid function is used to predict accurate HOMO- LUMO gaps and orbital delocalization in aromatic systems. As reported in studies of gold thiophene systems, charge-transport calculations across molecular junctions use the PBE0 functional within the Generalized Gradient Approximation (GGA). The basis set for this study is 6-31G\*\*, which includes the contribution of d orbitals on S, C, and N atoms in the macrocyclic molecular systems. Since heavy Au atoms are used as electrodes in macrocyclic molecular junctions, the LANL2DZ basis set with effective core potentials is used. Thus, for thiophene-functionalized aromatic molecular junctions, the GENECP basis set is used, with 6-31G\*\* for lighter atoms and LANL2DZ for heavy atoms, which provides accurate results while lowering computational cost. The molecular junctions are designed by anchoring Marksüf Decahedron Au clusters that mimic the properties of the Au (111) surface. For the transport calculations, a single zeta potential (SZP) is used for the valence electrons of Au, and a double zeta potential (DZP) is used for other atoms in the system.

## **2. Comparison of the SZP and DZP basis sets for modelling metal contacts**

We investigated the charge transport and electronic properties of the thiophene-based D-A macrocyclic structure connected to the gold electrodes, using basis-set approaches that balance accuracy and computational cost, particularly at the metal-molecule interface. The macrocyclic system consists of alternating thiophene donor units and DPP or BT as acceptor units. It has

been designed to improve the charge transport by tuning the frontier orbital energies and radial  $\pi$ -conjugation. The macrocyclic molecules are attached to the Au<sub>18</sub> clusters on both sides through sulphur linkers, which is effective for anchoring geometry and electrode spacing. [1,2]

The gold electrodes were modelled in the Single-zeta Polarized (SZP) basis set using the LANL2DZ pseudopotential. This basis set helps gold atoms to delocalize the electronic states.[3] Especially, it reduces the computational cost compared to Double Zeta Polarization (DZP). For the organic molecules, we have used the Double Zeta Polarized basis set (6-316\*\*). It studied the molecular orbital energies,  $\pi$ -conjugation, and D-A interactions.[4] This level was critical for describing the radial  $\pi$ -conjugation, HOMO-LUMO gap, and orbital localization. Even though the DZP increased the computational cost, this accuracy is necessary to know the structural changes and device performance. Overall, the mixed-basis set GENECP (LANL2DZ for gold and 6-31G\*\*) with the PBE0 exchange-correlation functional provides both accuracy and efficiency.[5]

### **3.HOMO and LUMO isosurface representation of the macrocyclic molecules**

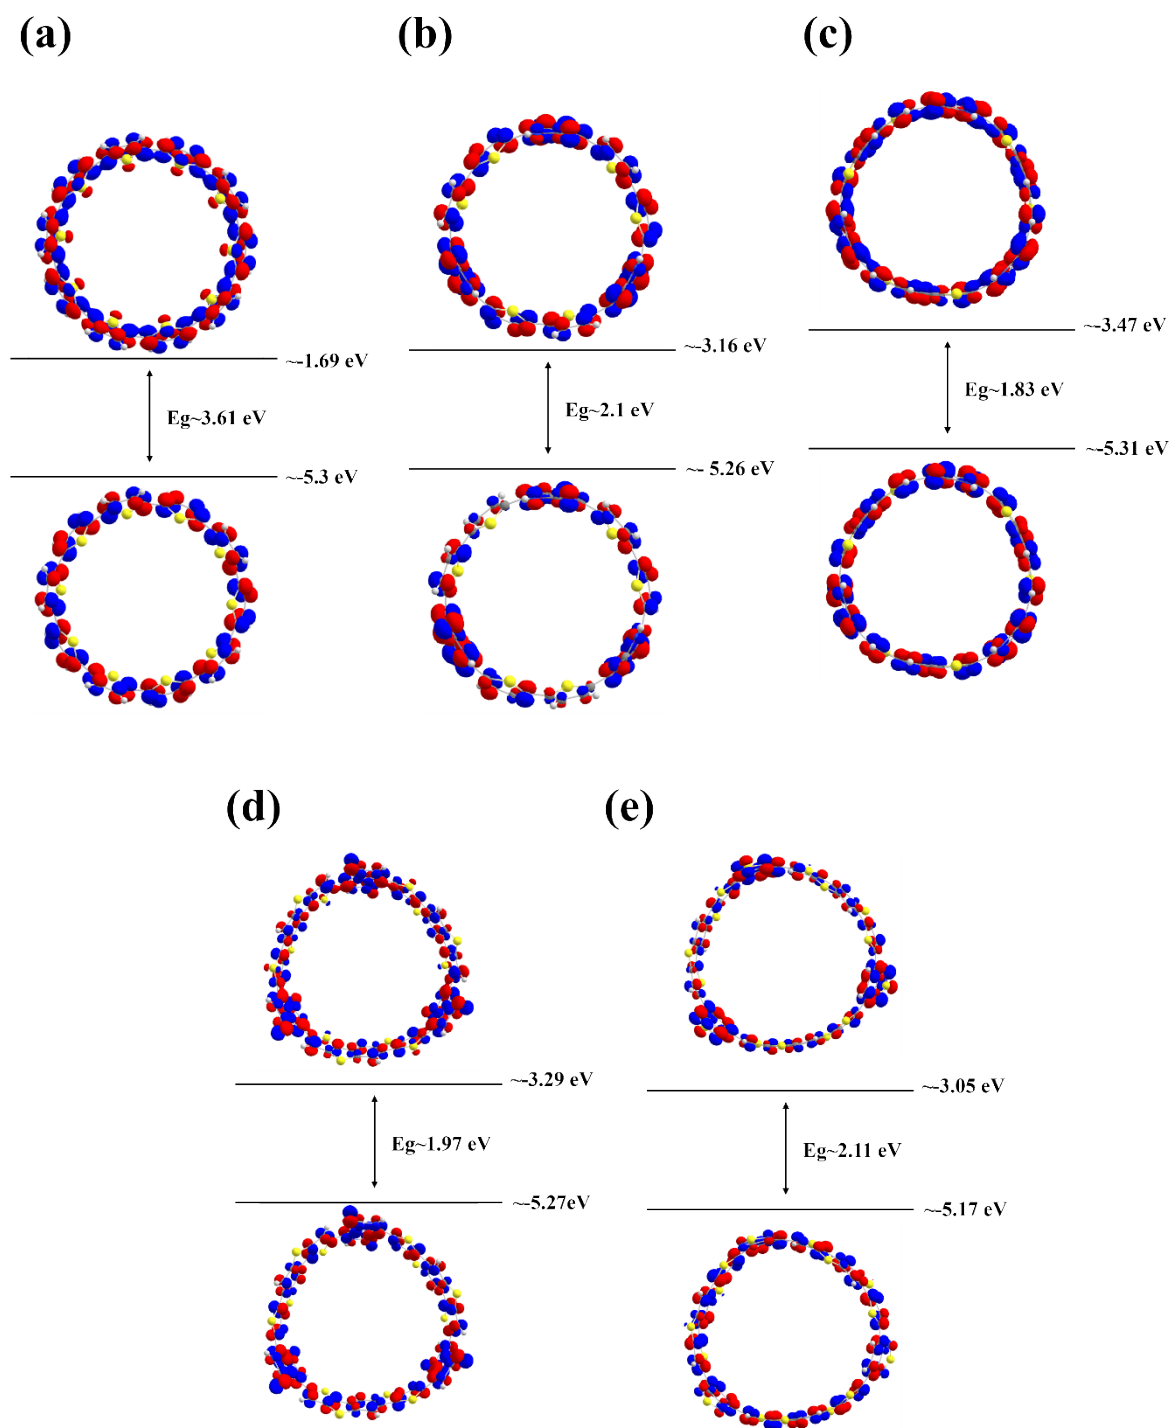

Figure S1: HOMO and LUMO isosurface representation of (a) [PT]<sub>10</sub>, (b) [TT-DPP]<sub>3</sub>, (c) [BDT-DPP]<sub>3</sub>, (d) [DTBDT-DPP]<sub>3</sub>, and (e) [DTBDT-BT]<sub>3</sub> isolated macrocyclic molecules calculated at PBE0/6-31G\*\*

Figure S1. The HOMO and LUMO isosurface representation of the five isolated macrocyclic molecules [PT]<sub>10</sub>, [TT-DPP]<sub>3</sub>, [BDT-DPP]<sub>3</sub>, [DTBDT-DPP]<sub>3</sub>, and [DTBDT-BT]<sub>3</sub> calculated

at the PBE0/6-31G\*\* level of theory (isovalue =0.025 a.u.). The HOMO is delocalized predominantly over the electron-rich donor units (thiophene, TT, BDT, and DTBDT). At the same time, the LUMO concentrates on the electron-deficient acceptor units (DPP and BT), consistent with donor-acceptor intramolecular charge transfer. In all five systems, the HOMO and LUMO densities are localized on the terminal sulphur atoms, confirming that the Au-S anchor sites are electronically accessible for coupling to the gold electrode.

#### **4.Comparative Analysis of Gold Nanocluster models and selection of the Au18 cluster as electrode model**

The electrode contacts in each molecular junction were represented by an Au18 truncated decahedral nanocluster the decahedron geometry. This cluster consists of 18 gold atoms in a truncated decahedral arrangement with approximate  $C_{2v}$  local symmetry and an Au-Au bond length of 2.88 Å, replicating the local atomic coordination environment of the Au(111) surface.<sup>[4,5]</sup> Its electronic structure was calculated at the PBE0/LANL2DZ level of theory. Table S1 compares the eight Au cluster models by their HOMO, LUMO, and HOMO-LUMO gap values. Among these, the Au18 Marks decahedron gives the HOMO energy of -5.85 eV, the closest match to the macrocyclic molecules' HOMO energies (-5.17 to -5.85 eV). This HOMO alignment reduces the energy offset at the metal-molecule interface and suppresses the charge transfer between the cluster and the molecule during geometry optimization. The Au18 Markshedron was selected over periodic slab models for two reasons. First, finite cluster models permit full geometric relaxation upon molecular adsorption, capturing the structural recognition of surface Au atoms at the binding site, a relaxation that rigid-sphere models suppress. <sup>[4,5]</sup>. The structure is substantially less computationally expensive than periodic calculations, establishing it as the standard electrode model in DFT studies of single-molecule junctions. <sup>[3,4,5]</sup> optimized Cartesian coordinates of the isolated Au18 cluster and all five molecular junctions.

**Table S1:** HOMO, LUMO, and band gap ( $E_g$ ) values for gold cluster calculated at the PBE0/LANL2DZ

| Name                         | HOMO (eV) | LUMO (eV) | Energy (eV) |
|------------------------------|-----------|-----------|-------------|
| G1-Au6-Octahedron            | -6.18     | -4.07     | 2.10        |
| G1-Au7-Pentagonal Decahedron | -5.47     | -3.93     | 1.54        |
| G1-Au13-cubotahedron         | -5.65     | -4.44     | 1.19        |
| G1-Au13-Icosahedron          | -5.06     | -3.93     | 1.12        |
| G1-Au14-Cube                 | -5.72     | -3.43     | 2.28        |
| G1-Au18-Marksüf Decahedron   | -5.85     | -3.82     | 2.03        |
| G2-Au19-Octahedron           | -5.18     | -4.21     | 0.96        |

## 5.Optimized structure of the Au-S distances

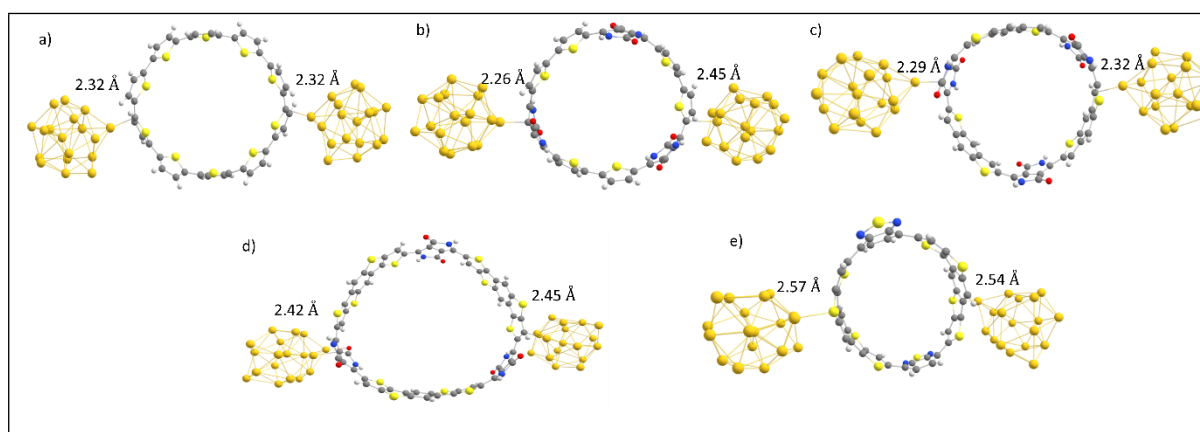

Figure S2: Geometry-optimized molecular junctions of a) [PT]<sub>10</sub>, b) [TT-DPP]<sub>3</sub>, c) [BDT-DPP]<sub>3</sub>, d) [DTBDT-DPP]<sub>3</sub>, and e) [DTBDT-BT]<sub>3</sub> anchored to Au<sub>18</sub> electrode clusters via Au-S bonds, calculated at the PBE0/GENECP level of theory.

Figure S2 shows the optimized geometry of the molecular junctions for all five macrocyclic systems anchored to Au<sub>18</sub> Marks decahedron electrode clusters, with Au-S bonds, calculated at the PBE0/GENECP level of theory. The Au-S bond distances vary systematically across the series, reflecting the differences in electronic character and metal-molecule-metal coupling strength at each interface. For [PT]<sub>10</sub>, both Au-S contacts are equivalent at 2.32 Å, consistent with the symmetric, homogeneous thiophene-based anchor environment. In [TT-DPP]<sub>3</sub>, the two Au-S distances are 2.26 Å and 2.45 Å, which indicates the asymmetric binding geometry arising from the D-A character of the macrocycle and the unequal electronic environment at the two sulphur anchor sites. Similarly, [BDT-DPP]<sub>3</sub> exhibits Au-S distances of 2.29 Å and

2.32 Å, reflecting a more symmetric contact geometry consistent with the near-equivalent HOMO density at both anchor sulphur atoms. For [DTBDT-DPP]<sub>3</sub>, the Au-S distances are 2.42 Å and 2.45 Å, the longest among the DPP-based systems, which correlates with the stronger orbital hybridization and greater Au cluster distortion observed for this junction. Finally, [DTBDT-BT]<sub>3</sub> shows the largest Au-S distances in the series, at 2.57 Å and 2.54 Å, consistent with a weaker, more elongated Au-S contact, which is consistent with the higher hole and electron injection barriers observed for this system.

**Table S2.** Cartesian coordinates of the linear and macrocyclic molecules [PT]<sub>10</sub>, [TT-DPP]<sub>3</sub>, [BDT-DPP]<sub>3</sub>, [DTBDT-DPP]<sub>3</sub>, and [DTBDT-BT]<sub>3</sub>.

| PT (Polythiophene) |           |           |           | PT (Polythiophene) |           |           |           |
|--------------------|-----------|-----------|-----------|--------------------|-----------|-----------|-----------|
| Linear             |           |           |           | Macrocycle         |           |           |           |
|                    | X         | Y         | Z         |                    | X         | Y         | Z         |
| C                  | 18.576768 | 0.141065  | 1.504887  | C                  | 4.827413  | 4.081759  | 0.146556  |
| C                  | 18.124468 | 1.382664  | 1.158726  | C                  | 4.67015   | 4.77264   | 1.32809   |
| C                  | 16.752139 | 1.385391  | 0.801803  | C                  | 3.553176  | 5.653571  | 1.328188  |
| C                  | 16.167148 | 0.141803  | 0.880899  | C                  | 2.844524  | 5.645565  | 0.146728  |
| S                  | 17.327877 | -1.038136 | 1.414374  | S                  | 3.58086   | 4.540318  | -0.998696 |
| H                  | 18.753644 | 2.265057  | 1.150428  | H                  | 5.322561  | 4.623309  | 2.18187   |
| H                  | 16.212853 | 2.267672  | 0.474886  | H                  | 3.256017  | 6.253168  | 2.182038  |
| C                  | 14.803745 | -0.239063 | 0.593819  | C                  | 1.506208  | 6.139715  | -0.146237 |
| C                  | 14.290783 | -1.488718 | 0.326774  | C                  | 0.972874  | 6.606272  | -1.327742 |
| S                  | 13.539431 | 0.954025  | 0.560718  | S                  | 0.2282    | 5.777906  | 0.999012  |
| C                  | 12.902351 | -1.48488  | 0.075229  | C                  | -0.448565 | 6.662398  | -1.327826 |
| H                  | 14.9085   | -2.379004 | 0.284664  | H                  | 1.588445  | 6.868916  | -2.18154  |
| C                  | 12.335125 | -0.231091 | 0.145796  | C                  | -1.017158 | 6.239332  | -0.146386 |
| H                  | 12.334488 | -2.372332 | -0.181775 | H                  | -1.041413 | 6.972803  | -2.181678 |
| C                  | 10.44231  | 1.411818  | -0.29217  | C                  | -3.096142 | 5.91634   | 1.327945  |
| C                  | 10.963547 | 0.156247  | -0.064585 | C                  | -2.39032  | 5.85239   | 0.146504  |
| C                  | 9.043562  | 1.4164    | -0.469535 | C                  | -4.279119 | 5.12626   | 1.327901  |
| C                  | 8.473827  | 0.164332  | -0.380362 | C                  | -4.490355 | 4.449828  | 0.14642   |
| C                  | 7.091412  | -0.213758 | -0.519924 | C                  | -5.373861 | 3.329716  | -0.146629 |
| C                  | 6.550812  | -1.466485 | -0.717804 | C                  | -5.982282 | 2.966612  | -1.328173 |
| S                  | 5.830479  | 0.982399  | -0.436865 | S                  | -5.424963 | 2.00257   | 0.998741  |
| C                  | 5.14514   | -1.462062 | -0.823977 | C                  | -6.475013 | 1.632115  | -1.328205 |
| H                  | 7.15886   | -2.359424 | -0.812286 | H                  | -6.04173  | 3.633163  | -2.182021 |
| C                  | 4.588755  | -0.205913 | -0.709032 | C                  | -6.248542 | 0.960697  | -0.146683 |
| H                  | 4.552731  | -2.351339 | -1.009117 | H                  | -6.953345 | 1.164159  | -2.182076 |
| C                  | 3.203634  | 0.180873  | -0.778886 | C                  | -6.304934 | -0.464816 | 0.146301  |

|   |            |           |           |
|---|------------|-----------|-----------|
| C | 2.661689   | 1.437118  | -0.949241 |
| S | 1.940861   | -1.007344 | -0.632762 |
| C | 1.252528   | 1.441643  | -0.984668 |
| H | 3.269823   | 2.326283  | -1.073997 |
| C | 0.69465    | 0.188943  | -0.841982 |
| H | 0.657183   | 2.334705  | -1.139675 |
| C | -0.69465   | -0.188947 | -0.841979 |
| C | -1.252528  | -1.441649 | -0.984652 |
| S | -1.940861  | 1.007342  | -0.63277  |
| C | -2.661688  | -1.437124 | -0.949224 |
| H | -0.657183  | -2.334712 | -1.139651 |
| C | -3.203634  | -0.180877 | -0.77888  |
| H | -3.269822  | -2.326291 | -1.07397  |
| C | -4.588754  | 0.205909  | -0.709028 |
| C | -5.145139  | 1.462058  | -0.823981 |
| C | -6.550811  | 1.466481  | -0.717807 |
| C | -7.091411  | 0.213756  | -0.51992  |
| H | -7.158859  | 2.35942   | -0.812293 |
| C | -8.473826  | -0.164333 | -0.380355 |
| C | -9.043561  | -1.416403 | -0.469515 |
| S | -9.692252  | 1.03126   | -0.042603 |
| C | -10.442309 | -1.41182  | -0.292151 |
| H | -8.46729   | -2.309058 | -0.686633 |
| C | -10.963547 | -0.156247 | -0.064581 |
| H | -11.060608 | -2.300266 | -0.357986 |
| C | -12.335125 | 0.231092  | 0.145795  |
| C | -12.902353 | 1.48488   | 0.075213  |
| S | -13.539431 | -0.954021 | 0.560726  |
| C | -14.290786 | 1.48872   | 0.326754  |
| H | -12.334491 | 2.372331  | -0.1818   |
| C | -14.803747 | 0.239067  | 0.593811  |
| H | -14.908504 | 2.379004  | 0.28463   |
| C | -16.752152 | -1.385379 | 0.801758  |
| C | -16.16715  | -0.141798 | 0.88089   |
| C | -18.124478 | -1.382652 | 1.158693  |
| C | -18.576764 | -0.141061 | 1.504899  |
| S | -17.327867 | 1.038134  | 1.414408  |
| S | -5.830478  | -0.982401 | -0.436855 |
| H | -16.212875 | -2.267653 | 0.474805  |
| H | -18.753661 | -2.26504  | 1.15037   |
| H | -4.552731  | 2.351334  | -1.009125 |
| S | 9.692251   | -1.031259 | -0.042594 |
| H | 8.467292   | 2.309053  | -0.686666 |
| H | 11.06061   | 2.300262  | -0.358015 |
| H | -19.571979 | 0.150716  | 1.810888  |

|   |           |           |           |
|---|-----------|-----------|-----------|
| C | -6.583836 | -1.116252 | 1.327793  |
| S | -5.565817 | -1.568413 | -0.998929 |
| C | -6.197891 | -2.485453 | 1.327866  |
| H | -7.023869 | -0.611997 | 2.181595  |
| C | -5.619842 | -2.895456 | 0.146414  |
| H | -6.30988  | -3.145221 | 2.181707  |
| C | -4.827455 | -4.081811 | -0.146472 |
| C | -4.670118 | -4.772851 | -1.327903 |
| S | -3.580848 | -4.540075 | 0.998841  |
| C | -3.55314  | -5.653778 | -1.32782  |
| H | -5.322499 | -4.623659 | -2.18173  |
| C | -2.844535 | -5.645593 | -0.146336 |
| H | -3.255945 | -6.253505 | -2.181567 |
| C | -1.506214 | -6.139676 | 0.146732  |
| C | -0.972826 | -6.605873 | 1.328354  |
| C | 0.448616  | -6.66199  | 1.328391  |
| C | 1.017149  | -6.239278 | 0.146795  |
| H | 1.041506  | -6.972114 | 2.182315  |
| C | 2.390289  | -5.852395 | -0.146289 |
| C | 3.095968  | -5.916467 | -1.327809 |
| S | 3.211635  | -4.808466 | 0.998872  |
| C | 4.278958  | -5.126405 | -1.327981 |
| H | 2.752319  | -6.490853 | -2.181545 |
| C | 4.490341  | -4.449858 | -0.146591 |
| H | 4.941037  | -5.029173 | -2.181842 |
| C | 5.373907  | -3.329743 | 0.146251  |
| C | 5.982672  | -2.966701 | 1.327637  |
| S | 5.424605  | -2.002505 | -0.999034 |
| C | 6.475392  | -1.632201 | 1.327603  |
| H | 6.042391  | -3.633307 | 2.181423  |
| C | 6.248573  | -0.960715 | 0.146187  |
| H | 6.953987  | -1.164298 | 2.181356  |
| C | 6.58363   | 1.116343  | -1.3282   |
| C | 6.304897  | 0.464815  | -0.146717 |
| C | 6.197683  | 2.485543  | -1.328107 |
| C | 5.619775  | 2.895437  | -0.146549 |
| S | 5.566064  | 1.568347  | 0.998757  |
| S | -0.228264 | -5.778273 | -0.998709 |
| H | 7.023542  | 0.612157  | -2.182106 |
| H | 6.309541  | 3.145379  | -2.181913 |
| H | -1.588356 | -6.868241 | 2.182266  |
| S | -3.211516 | 4.80856   | -0.998856 |
| H | -4.941293 | 5.02893   | 2.181677  |
| H | -2.752607 | 6.490655  | 2.181776  |

|   |           |           |          |
|---|-----------|-----------|----------|
| H | 19.571987 | -0.150714 | 1.810857 |
|---|-----------|-----------|----------|

| TT-DPP |           |           |          |
|--------|-----------|-----------|----------|
| Linear |           |           |          |
|        | X         | Y         | Z        |
| C      | -5.570087 | 0.144609  | 0.000019 |
| C      | -4.951485 | 1.385131  | 0.000224 |
| S      | -4.383369 | -1.125181 | 0.000054 |
| C      | -3.552032 | 1.321439  | 0.000305 |
| H      | -5.508454 | 2.315675  | 0.000272 |
| C      | -3.074197 | 0.019475  | 0.000187 |
| H      | -2.880537 | 2.176394  | 0.000423 |
| C      | -1.706394 | -0.374935 | 0.00022  |
| C      | -0.570712 | 0.419567  | 0.000251 |
| N      | -1.271621 | -1.688075 | 0.000205 |
| C      | -0.137653 | 1.80503   | 0.00022  |
| C      | 0.570712  | -0.419566 | 0.000257 |
| C      | 0.137653  | -1.80503  | 0.000242 |
| H      | -1.862032 | -2.504976 | 0.000228 |
| N      | 1.271621  | 1.688075  | 0.000185 |
| C      | 1.706394  | 0.374935  | 0.000217 |
| H      | 1.862032  | 2.504976  | 0.000198 |
| C      | 3.074197  | -0.019475 | 0.000191 |
| C      | 3.552032  | -1.321439 | 0.000328 |
| S      | 4.383369  | 1.125181  | -        |

| TT-DPP     |          |           |           |
|------------|----------|-----------|-----------|
| Macrocycle |          |           |           |
|            | X        | Y         | Z         |
| C          | 1.801307 | -5.669981 | -0.097206 |
| C          | 2.552358 | -5.707556 | -1.259343 |
| S          | 2.674177 | -4.836347 | 1.173632  |
| C          | 3.799575 | -5.052753 | -1.157336 |
| H          | 2.185697 | -6.163055 | -2.172986 |
| C          | 4.021226 | -4.499997 | 0.095563  |
| H          | 4.488153 | -4.906525 | -1.981154 |
| C          | 4.988745 | -3.50301  | 0.452555  |
| C          | -5.64601 | -2.616756 | -0.388487 |
| N          | 5.136311 | -3.021128 | 1.751743  |
| C          | 5.584172 | -2.229968 | -1.795909 |
| C          | 6.044806 | -1.478774 | 0.388144  |
| C          | 5.755306 | -1.742435 | 1.795588  |
| H          | 4.861849 | -3.505539 | 2.595319  |
| N          | -5.89874 | -0.844612 | -1.752036 |
| C          | 6.084256 | -0.37606  | -0.45285  |
| H          | 5.986526 | -0.294788 | -2.595593 |
| C          | 5.950644 | 1.006723  | -0.095749 |
| C          | 6.122118 | 1.57666   | 1.15732   |
| S          | -        | 2.11055   | -1.173859 |

|   |           |           |          |
|---|-----------|-----------|----------|
|   |           |           | 0.000063 |
| C | 4.951485  | -1.385131 | 0.000249 |
| H | 2.880537  | -2.176394 | 0.000456 |
| C | 5.570087  | -0.144609 | 0.000027 |
| H | 5.508454  | -2.315675 | 0.000312 |
| C | 6.971665  | 0.160556  | -        |
| C | 7.590261  | 1.400706  | 0.000652 |
| S | 8.158594  | -1.109213 | 0.000467 |
| C | 8.990141  | 1.336724  | -0.00064 |
| H | 7.03359   | 2.331468  | -        |
| C | 9.467309  | 0.035122  | -0.00007 |
| H | 9.661796  | 2.191502  | -        |
| C | 10.836342 | -0.36039  | 0.000075 |
| C | 11.970583 | 0.43288   | -0.00029 |
| N | 11.269845 | -1.674209 | 0.000649 |
| C | 12.405189 | 1.817354  | -0.00088 |
| C | 13.113602 | -0.40807  | 0.000057 |
| C | 12.679854 | -1.792932 | 0.000644 |
| H | 10.678742 | -2.490562 | 0.000981 |
| N | 13.814946 | 1.698115  | -        |
| C | 14.24714  | 0.385262  | 0.000838 |
| H | 14.407782 | 2.513301  | -0.00029 |
| H | 14.407782 | 2.513301  | -        |
| C | 15.6219   | -0.006228 | 0.001259 |
| C | 16.102909 | -1.302622 | -        |
| S | 16.928508 | 1.141463  | 0.000105 |
| C | 17.514291 | -1.356243 | 0.000258 |
| H | 15.435853 | -2.160868 | -        |
| C | 18.096333 | -0.115781 | 0.000318 |
| H | 18.085003 | -2.277297 | 0.000338 |
| C | -         | 0.115781  | 0.000464 |
| C | 18.096333 | 0.115781  | 0.000051 |
| C | -         | 1.356243  | 0.000601 |
| C | -         | 1.356243  | 0.000057 |
| C | -         | 1.356243  | 0.000346 |

|   |          |          |           |
|---|----------|----------|-----------|
|   | 5.108536 |          |           |
| C | -        | 2.86673  | 1.259407  |
| H | 6.568451 | 1.032358 | 1.981166  |
| C | 4.946546 | 3.306432 | 0.097178  |
| H | 5.553996 | 3.451234 | 2.173199  |
| C | 4.010272 | 4.395161 | -0.096587 |
| C | 3.667134 | 5.064272 | -1.258752 |
| S | 2.851713 | 4.734022 | 1.174207  |
| C | 2.476254 | 5.816662 | -1.156838 |
| H | 4.244941 | 4.974554 | -2.172403 |
| C | 1.886712 | 5.732192 | 0.096071  |
| H | 2.005235 | 6.339723 | -1.980702 |
| C | 0.539424 | 6.071219 | 0.452911  |
| C | 0.556624 | 6.197431 | -0.388274 |
| N | -0.04814 | 5.957831 | 1.751987  |
| C | 0.860515 | 5.950787 | -1.795777 |
| C | 1.741634 | 5.973597 | 0.388163  |
| C | 1.368729 | 5.854402 | 1.795628  |
| H | -0.60466 | 5.962621 | 2.595713  |
| N | 2.217472 | 5.530223 | -1.752126 |
| C | 2.716264 | 5.456633 | -0.453054 |
| H | 2.73739  | 5.331563 | -2.595827 |
| C | 3.847202 | 4.649728 | -0.09622  |
| C | 4.42721  | 4.513694 | 1.156585  |
| S | 4.381542 | 3.368181 | -1.174193 |
| C | 5.261839 | 3.378927 | 1.25855   |
| H | 4.17951  | 5.17264  | 1.980375  |
| C | 5.337104 | 2.630512 | 0.096538  |
| H | 5.76736  | 3.084894 | 2.172148  |
| C | 5.811843 | 1.275278 | -0.097055 |
| C | 6.219736 | 0.643371 | -1.259122 |

|   |           |           |          |
|---|-----------|-----------|----------|
|   | 17.514291 |           |          |
| S | -         |           |          |
|   | 16.928508 | -1.141463 | -0.00032 |
| C | -         |           |          |
|   | 16.102909 | 1.302622  | 0.000263 |
| H | -         |           |          |
|   | 18.085003 | 2.277297  | 0.000612 |
| C | -         |           |          |
|   | -15.6219  | 0.006228  | 0.000103 |
| H | -         |           |          |
|   | 15.435853 | 2.160868  | 0.000471 |
| C | -         |           |          |
|   | -14.24714 | -0.385262 | 0.000289 |
| C | -         |           |          |
|   | 13.113602 | 0.40807   | 0.000063 |
| N | -         |           |          |
|   | 13.814946 | -1.698115 | 0.000837 |
| C | -         |           |          |
|   | 12.679854 | 1.792932  | 0.000663 |
| C | -         |           |          |
|   | 11.970583 | -0.43288  | 0.000294 |
| C | -         |           |          |
|   | 12.405189 | -1.817354 | 0.000896 |
| H | -         |           |          |
|   | 14.407782 | -2.513301 | -0.00125 |
| N | -         |           |          |
|   | 11.269845 | 1.674209  | 0.000653 |
| C | -         |           |          |
|   | 10.836342 | 0.36039   | 0.000076 |
| H | -         |           |          |
|   | 10.678742 | 2.490562  | 0.000976 |
| C | -         |           |          |
|   | -9.467309 | -0.035122 | 0.000072 |
| C | -         |           |          |
|   | -8.990141 | -1.336724 | 0.000649 |
| S | -         |           |          |
|   | -8.158594 | 1.109213  | 0.000471 |
| C | -         |           |          |
|   | -7.590261 | -1.400706 | 0.000665 |
| H | -         |           |          |
|   | -9.661796 | -2.191502 | -0.00105 |
| C | -         |           |          |
|   | -6.971665 | -0.160556 | 0.000116 |
| H | -         |           |          |
|   | -7.03359  | -2.331468 | 0.001112 |
| O | -         |           |          |
|   | 11.809077 | -2.882329 | 0.001374 |
| O | -         |           |          |
|   | 13.275612 | 2.857644  | 0.001087 |
| O | -         |           |          |
|   | -0.735943 | 2.86863   | 0.000228 |

|   |          |           |           |
|---|----------|-----------|-----------|
|   |          |           |           |
| S | 5.526008 | 0.102733  | 1.173911  |
| C | 6.275799 | -0.764154 | -1.156979 |
| H | 6.430947 | 1.188478  | -2.172859 |
| C | 5.90788  | -1.232234 | 0.095994  |
| H | 6.493082 | -1.433773 | -1.980748 |
| C | 5.527984 | -2.568504 | 0.453129  |
| C | 5.08937  | -3.581004 | -0.38785  |
| N | 5.184181 | -2.937047 | 1.752277  |
| C | 4.723987 | -3.721096 | -1.795364 |
| C | 4.302922 | -4.495157 | 0.388701  |
| C | 4.385988 | -4.112229 | 1.796086  |
| H | 5.46642  | -2.457128 | 2.595853  |
| N | 3.681377 | -4.686076 | -1.751661 |
| C | 3.367944 | -5.080822 | -0.452505 |
| H | 3.249437 | -5.037201 | -2.595311 |
| C | 2.103446 | -5.65638  | -0.095711 |
| C | 1.695346 | -6.090229 | 1.157154  |
| S | 0.726611 | -5.478432 | -1.173952 |
| C | 0.295236 | -6.245212 | 1.258986  |
| H | 2.389735 | -6.20517  | 1.981053  |
| C | -0.39028 | -5.93642  | 0.096761  |
| H | -0.21237 | -6.53567  | 2.172569  |
| O | 3.933104 | -4.602631 | 2.820018  |
| O | 5.141587 | -3.200212 | -2.819247 |
| O | -        |           |           |
|   | 5.341301 | -2.851731 | -2.819849 |

|   |           |           |          |
|---|-----------|-----------|----------|
| O | 0.735943  | -2.86863  | 0.00026  |
| O | 11.809077 | 2.882329  | 0.001345 |
| O | 13.275612 | -2.857644 | 0.001068 |
| H | 19.149254 | -0.131275 | 0.000054 |
| H | 19.149254 | 0.131275  | 0.000047 |

|   |          |           |           |
|---|----------|-----------|-----------|
| O | 5.954329 | -1.105313 | 2.819558  |
| O | 0.200536 | 6.051648  | -2.819646 |
| O | 2.020074 | 5.707867  | 2.819505  |

| BDT-DPP |          |          |          |
|---------|----------|----------|----------|
| Linear  |          |          |          |
|         | X        | Y        | Z        |
| C       | -5.70351 | -5.96846 | -0.48773 |
| C       | -6.51072 | -5.23894 | 0.378317 |
| N       | -6.01805 | -5.54537 | -1.77727 |
| C       | -6.58184 | -4.88922 | 1.791501 |
| C       | -7.20089 | -4.24107 | -0.37839 |
| C       | -6.8989  | -4.43111 | -1.7916  |
| H       | -5.61646 | -5.90115 | -2.63344 |
| N       | -7.31381 | -3.67197 | 1.777179 |
| C       | -7.59853 | -3.2283  | 0.487635 |
| H       | -7.50534 | -3.17086 | 2.633381 |
| C       | -7.95008 | 0.084912 | -1.05996 |
| C       | -7.8282  | 0.629779 | 0.215448 |
| S       | -7.71574 | 1.29249  | -2.32056 |
| C       | -7.47597 | 2.015537 | 0.244656 |
| C       | -7.30111 | 2.503251 | -1.09    |
| C       | -6.56294 | 4.061481 | 1.09017  |
| C       | -6.29651 | 4.505835 | -0.2445  |
| S       | -5.88873 | 5.149256 | 2.320734 |
| C       | -5.44751 | 5.656313 | -0.21529 |
| C       | -5.10308 | 6.095744 | 1.060117 |
| O       | -7.24817 | -3.84626 | -2.80901 |
| O       | -6.15793 | -5.42242 | 2.808928 |
| C       | -7.15054 | 2.830163 | 1.339794 |
| C       | -6.72072 | 3.737991 | -1.33963 |
| H       | -7.28293 | 2.46503  | 2.353877 |
| H       | -6.52217 | 4.071784 | -2.35371 |
| S       | -4.48783 | 6.445312 | -1.43076 |

| BDT-DPP    |          |          |          |
|------------|----------|----------|----------|
| Macrocycle |          |          |          |
|            | X        | Y        | Z        |
| C          | -2.36707 | -5.89549 | -0.71412 |
| C          | -3.27088 | -5.56428 | 0.290634 |
| C          | -3.28719 | -5.3652  | 1.734915 |
| C          | -4.32675 | -4.78997 | -0.29004 |
| C          | -4.13251 | -4.74647 | -1.73442 |
| H          | -2.51417 | -5.56893 | -2.82661 |
| C          | -4.91366 | -4.02679 | 0.714556 |
| H          | -4.5571  | -4.0678  | 2.826881 |
| C          | -5.6158  | -2.77682 | 0.60116  |
| C          | -5.85071 | -2.10035 | -0.57589 |
| S          | -5.82202 | -1.72724 | 2.024748 |
| C          | -6.02365 | -0.69561 | -0.39256 |
| H          | -5.74152 | -2.5764  | -1.54566 |
| C          | -5.98817 | -0.31391 | 0.986722 |
| C          | -5.77724 | 1.606485 | -0.98653 |
| C          | -5.72896 | 1.9868   | 0.39275  |
| S          | -5.30826 | 2.949983 | -2.0246  |
| C          | -5.25513 | 3.320489 | 0.576028 |
| C          | -4.87893 | 3.929737 | -0.60106 |
| H          | -5.04505 | 3.761474 | 1.545763 |
| C          | -3.92219 | 4.997454 | -0.71452 |
| C          | -3.18354 | 5.614896 | 0.29008  |
| C          | -3.00326 | 5.530064 | 1.734429 |
| C          | -1.98487 | 6.141664 | -0.29064 |
| C          | -2.04409 | 5.951069 | -1.73494 |
| H          | -3.56564 | 4.960712 | -2.82695 |
| C          | -1.03065 | 6.268726 | 0.714051 |

|   |          |          |          |
|---|----------|----------|----------|
| C | -4.06326 | 7.047707 | 1.095006 |
| H | -3.59453 | 7.447599 | 1.988172 |
| C | -3.57642 | 7.314046 | -0.17842 |
| C | -8.02779 | -1.32273 | -1.09485 |
| S | -7.83056 | -0.6126  | 1.430892 |
| H | -8.04022 | -1.93874 | -1.98802 |
| C | -7.92508 | -1.86813 | 0.178535 |
| C | -4.54612 | -6.75405 | -0.17862 |
| S | -3.33796 | -7.10861 | -1.43096 |
| C | -4.07211 | -7.04272 | 1.094769 |
| C | -2.1749  | -7.54546 | -0.21552 |
| C | -2.72773 | -7.4671  | 1.059883 |
| H | -4.65283 | -6.83691 | 1.987954 |
| C | -0.75405 | -7.70548 | -0.24468 |
| S | -1.51525 | -7.67439 | 2.320514 |
| C | -0.23605 | -7.71418 | 1.090001 |
| C | 0.123043 | -7.68877 | -1.33978 |
| C | 1.124096 | -7.6073  | 1.339666 |
| C | 1.482543 | -7.57396 | -1.09012 |
| H | -0.26529 | -7.68357 | -2.35387 |
| C | 1.992315 | -7.48163 | 0.244564 |
| H | 1.50646  | -7.53944 | 2.353769 |
| S | 2.73837  | -7.32731 | -2.32063 |
| C | 3.368505 | -7.09368 | 0.215427 |
| C | 3.901332 | -6.92667 | -1.05996 |
| S | 4.445489 | -6.47438 | 1.43093  |
| C | 5.159234 | -6.29014 | -1.09478 |
| C | 5.580266 | -5.92872 | 0.178659 |
| H | 5.698965 | -5.99286 | -1.98791 |
| C | 6.595102 | -4.96605 | 0.487822 |
| C | 7.273564 | -4.11542 | -0.37818 |
| N | 6.837049 | -4.4977  | 1.777383 |
| C | 7.792596 | -3.01881 | 0.378535 |
| C | 7.287215 | -3.75886 | -1.79139 |
| C | 7.52507  | -3.25511 | 1.79172  |
| H | 6.499091 | -4.91431 | 2.633592 |
| C | 8.020972 | -1.95502 | -0.4875  |
| N | 7.812327 | -2.43914 | -1.7771  |
| O | 6.95518  | -4.35377 | -2.80876 |
| O | 7.774577 | -2.62121 | 2.809108 |
| H | 7.920078 | -1.91359 | -2.6333  |
| C | 8.12273  | -0.55995 | -0.17846 |
| S | 7.82586  | 0.663559 | -1.43088 |
| C | 8.135852 | -0.00504 | 1.094902 |
| C | 7.622702 | 1.889294 | -0.21549 |

|   |          |          |          |
|---|----------|----------|----------|
| H | -1.24495 | 5.981746 | 2.82654  |
| C | 0.402932 | 6.251621 | 0.600794 |
| C | 1.106354 | 6.116752 | -0.57618 |
| S | 1.414843 | 5.905527 | 2.024517 |
| C | 2.409396 | 5.564281 | -0.39266 |
| H | 0.639598 | 6.260119 | -1.54601 |
| C | 2.722056 | 5.342793 | 0.986677 |
| C | 4.280078 | 4.199964 | -0.9863  |
| C | 4.585102 | 3.968063 | 0.393033 |
| S | 5.209461 | 3.122191 | -2.02419 |
| C | 5.503192 | 2.890901 | 0.576497 |
| C | 5.842954 | 2.260461 | -0.60052 |
| H | 5.779947 | 2.488548 | 1.546297 |
| C | 6.289213 | 0.898021 | -0.71394 |
| C | 6.454454 | -0.05055 | 0.290562 |
| C | 6.290614 | -0.1645  | 1.734872 |
| C | 6.311439 | -1.35193 | -0.29038 |
| C | 6.176083 | -1.20511 | -1.73467 |
| H | 6.079274 | 0.607893 | -2.82641 |
| C | 5.944324 | -2.24203 | 0.714138 |
| H | 5.802496 | -1.91327 | 2.826617 |
| C | 5.212869 | -3.47506 | 0.600614 |
| C | 4.744318 | -4.01649 | -0.57648 |
| S | 4.407297 | -4.1788  | 2.02418  |
| C | 3.614253 | -4.86865 | -0.39316 |
| H | 5.101769 | -3.68361 | -1.54623 |
| C | 3.266206 | -5.02909 | 0.98616  |
| C | 1.497205 | -5.80609 | -0.98692 |
| C | 1.143994 | -5.95477 | 0.392395 |
| S | 0.098934 | -6.07139 | -2.02472 |
| C | -0.24788 | -6.21137 | 0.575925 |
| C | -0.96389 | -6.18997 | -0.60098 |
| H | -0.73455 | -6.25026 | 1.545781 |
| O | 6.007465 | -2.00509 | -2.64604 |
| O | 6.298943 | 0.653111 | 2.64616  |
| O | -2.58342 | -5.78162 | 2.646122 |
| O | -4.74126 | -4.20047 | -2.64562 |
| O | -3.71583 | 5.128828 | 2.645604 |
| O | -1.26663 | 6.204647 | -2.64611 |
| C | -5.97669 | 0.296155 | -1.39015 |
| C | -5.8984  | 1.008471 | 1.390345 |
| H | -5.82124 | 1.281642 | 2.438078 |
| H | -5.96075 | 0.012748 | -2.43789 |
| C | 3.822374 | 4.603951 | 1.390495 |
| C | 3.245009 | 5.027749 | -1.39011 |

|   |          |          |          |
|---|----------|----------|----------|
| C | 7.831289 | 1.371439 | 1.059937 |
| H | 8.247883 | -0.61083 | 1.98811  |
| C | 7.050692 | 3.199723 | -0.24473 |
| S | 7.404528 | 2.525185 | 2.320496 |
| C | 6.799278 | 3.652783 | 1.089912 |
| C | 6.597611 | 3.95085  | -1.33988 |
| C | 6.026676 | 4.777296 | 1.339519 |
| C | 5.818411 | 5.070801 | -1.09028 |
| H | 6.787263 | 3.611882 | -2.35396 |
| C | 5.483638 | 5.466229 | 0.244392 |
| H | 5.776776 | 5.07459  | 2.353609 |
| S | 4.976801 | 6.034938 | -2.32082 |
| C | 4.459514 | 6.464022 | 0.215228 |
| C | 4.048352 | 6.84179  | -1.06017 |
| S | 3.384678 | 7.087042 | 1.430733 |
| C | 2.868026 | 7.612701 | -1.09501 |
| C | 2.34452  | 7.796633 | 0.178424 |
| H | 2.340618 | 7.931293 | -1.98815 |
| C | 1.00337  | 8.194061 | 0.487615 |
| C | -0.07259 | 8.356109 | -0.37834 |
| N | 0.476866 | 8.16947  | 1.777196 |
| C | -1.28181 | 8.257532 | 0.378454 |
| C | -0.38828 | 8.189533 | -1.79151 |
| C | -0.94327 | 8.144252 | 1.791623 |
| H | 1.006667 | 8.084469 | 2.633328 |
| C | -2.31731 | 7.92338  | -0.48753 |
| N | -1.79374 | 7.984395 | -1.77711 |
| O | 0.292722 | 8.199892 | -2.80901 |
| O | -1.61693 | 8.04378  | 2.809104 |
| H | -2.3028  | 7.814988 | -2.63328 |

|   |          |          |          |
|---|----------|----------|----------|
| H | 2.99176  | 5.155594 | -2.43789 |
| H | 4.020257 | 4.400631 | 2.438266 |
| C | 2.731635 | -5.32357 | -1.39068 |
| C | 2.076173 | -5.6126  | 1.389882 |
| H | 2.968877 | -5.16778 | -2.43843 |
| H | 1.801237 | -5.68262 | 2.437655 |
| N | -4.38015 | -4.47729 | 1.92001  |
| N | -2.95743 | -5.52246 | -1.91955 |
| N | -3.3038  | 5.321684 | -1.92001 |
| N | -1.68782 | 6.032671 | 1.91952  |
| N | 6.260996 | 0.200527 | -1.91953 |
| N | 6.068295 | -1.55506 | 1.919727 |

| DTBDT-DPP |          |          |          |
|-----------|----------|----------|----------|
| Linear    |          |          |          |
|           | X        | Y        | Z        |
| C         | -7.45583 | -0.45463 | 0.000196 |
| C         | -6.36583 | 0.398523 | 0.00019  |
| N         | -6.95312 | -1.74305 | 0.000254 |
| C         | -6.00707 | 1.804367 | 0.000033 |
| C         | -5.18051 | -0.37911 | 0.000238 |
| C         | -5.53909 | -1.78477 | 0.000238 |
| H         | -7.49904 | -2.59041 | 0.000234 |

| DTBDT-DPP   |          |          |          |
|-------------|----------|----------|----------|
| Macrocyclic |          |          |          |
|             | X        | Y        | Z        |
| C           | -5.70351 | -5.96846 | -0.48773 |
| C           | -6.51072 | -5.23894 | 0.378317 |
| N           | -6.01805 | -5.54537 | -1.77727 |
| C           | -6.58184 | -4.88922 | 1.791501 |
| C           | -7.20089 | -4.24107 | -0.37839 |
| C           | -6.8989  | -4.43111 | -1.7916  |
| H           | -5.61646 | -5.90115 | -2.63344 |

|   |          |          |          |
|---|----------|----------|----------|
| N | -4.59324 | 1.762728 | 0.000025 |
| C | -4.09037 | 0.474308 | 0.000139 |
| H | -4.04723 | 2.610029 | -0.0001  |
| C | -0.76502 | -1.08926 | 0.000064 |
| C | -0.22365 | 0.190433 | 0.000016 |
| S | 0.466713 | -2.32407 | 0.00003  |
| C | 1.201554 | 0.232333 | -1.7E-05 |
| C | 1.724    | -1.09577 | -1.9E-05 |
| C | 3.433021 | 1.082778 | -5.9E-05 |
| C | 3.955645 | -0.2455  | -6.8E-05 |
| S | 4.69035  | 2.310831 | -7.1E-05 |
| C | 5.380849 | -0.20353 | -9.4E-05 |
| C | 5.922054 | 1.07591  | -7.5E-05 |
| O | -4.88443 | -2.8148  | 0.000251 |
| O | -6.66195 | 2.834195 | -9.4E-05 |
| C | 2.071165 | 1.327959 | -3.8E-05 |
| C | 3.086009 | -1.34102 | -5.1E-05 |
| H | 1.682235 | 2.341581 | -4.4E-05 |
| H | 3.474952 | -2.35461 | -6.6E-05 |
| S | 6.618838 | -1.4031  | -0.00011 |
| C | 7.326942 | 1.114583 | -0.00007 |
| H | 7.956539 | 2.001029 | -2.8E-05 |
| C | 7.858504 | -0.16435 | -7.2E-05 |
| C | -2.16962 | -1.12727 | 0.000127 |
| S | -1.46082 | 1.390445 | 0.000058 |
| H | -2.79947 | -2.01359 | 0.000199 |
| C | -2.70097 | 0.152064 | 0.000118 |
| C | -8.84547 | -0.13173 | 0.000133 |
| S | -10.0857 | -1.36984 | 0.000197 |
| C | -9.37629 | 1.147619 | -2E-06   |
| C | -11.3227 | -0.16956 | 0.000049 |
| C | -10.7811 | 1.109783 | -4.4E-05 |
| H | -8.74627 | 2.033799 | -3.1E-05 |
| C | -12.7481 | -0.21091 | 0.000031 |
| S | -12.0122 | 2.345236 | -0.0002  |
| C | -13.2699 | 1.117615 | -0.00011 |
| C | -13.6179 | -1.30605 | 0.000124 |
| C | -14.6317 | 1.36331  | -0.00016 |
| C | -14.98   | -1.06023 | 0.000081 |
| H | -13.2294 | -2.31982 | 0.000218 |
| C | -15.5014 | 0.268083 | -5.6E-05 |
| H | -15.0204 | 2.37705  | -0.00027 |
| S | -16.2375 | -2.28791 | 0.000178 |
| C | -16.9273 | 0.227008 | -7.4E-05 |
| C | -17.4685 | -1.05242 | 0.000051 |

|   |          |          |          |
|---|----------|----------|----------|
| N | -7.31381 | -3.67197 | 1.777179 |
| C | -7.59853 | -3.2283  | 0.487635 |
| H | -7.50534 | -3.17086 | 2.633381 |
| C | -7.95008 | 0.084912 | -1.05996 |
| C | -7.8282  | 0.629779 | 0.215448 |
| S | -7.71574 | 1.29249  | -2.32056 |
| C | -7.47597 | 2.015537 | 0.244656 |
| C | -7.30111 | 2.503251 | -1.09    |
| C | -6.56294 | 4.061481 | 1.09017  |
| C | -6.29651 | 4.505835 | -0.2445  |
| S | -5.88873 | 5.149256 | 2.320734 |
| C | -5.44751 | 5.656313 | -0.21529 |
| C | -5.10308 | 6.095744 | 1.060117 |
| O | -7.24817 | -3.84626 | -2.80901 |
| O | -6.15793 | -5.42242 | 2.808928 |
| C | -7.15054 | 2.830163 | 1.339794 |
| C | -6.72072 | 3.737991 | -1.33963 |
| H | -7.28293 | 2.46503  | 2.353877 |
| H | -6.52217 | 4.071784 | -2.35371 |
| S | -4.48783 | 6.445312 | -1.43076 |
| C | -4.06326 | 7.047707 | 1.095006 |
| H | -3.59453 | 7.447599 | 1.988172 |
| C | -3.57642 | 7.314046 | -0.17842 |
| C | -8.02779 | -1.32273 | -1.09485 |
| S | -7.83056 | -0.6126  | 1.430892 |
| H | -8.04022 | -1.93874 | -1.98802 |
| C | -7.92508 | -1.86813 | 0.178535 |
| C | -4.54612 | -6.75405 | -0.17862 |
| S | -3.33796 | -7.10861 | -1.43096 |
| C | -4.07211 | -7.04272 | 1.094769 |
| C | -2.1749  | -7.54546 | -0.21552 |
| C | -2.72773 | -7.4671  | 1.059883 |
| H | -4.65283 | -6.83691 | 1.987954 |
| C | -0.75405 | -7.70548 | -0.24468 |
| S | -1.51525 | -7.67439 | 2.320514 |
| C | -0.23605 | -7.71418 | 1.090001 |
| C | 0.123043 | -7.68877 | -1.33978 |
| C | 1.124096 | -7.6073  | 1.339666 |
| C | 1.482543 | -7.57396 | -1.09012 |
| H | -0.26529 | -7.68357 | -2.35387 |
| C | 1.992315 | -7.48163 | 0.244564 |
| H | 1.50646  | -7.53944 | 2.353769 |
| S | 2.73837  | -7.32731 | -2.32063 |
| C | 3.368505 | -7.09368 | 0.215427 |
| C | 3.901332 | -6.92667 | -1.05996 |

|   |          |          |          |
|---|----------|----------|----------|
| S | -18.1633 | 1.427348 | -0.00025 |
| C | -18.8738 | -1.08947 | 0.000053 |
| C | -19.4029 | 0.189578 | -4.2E-05 |
| H | -19.5056 | -1.97492 | 0.000128 |
| C | -20.7953 | 0.510862 | 0.000002 |
| C | -21.8771 | -0.34738 | 0.000023 |
| N | -21.295  | 1.798575 | -3E-06   |
| C | -23.0756 | 0.429244 | -2.7E-05 |
| C | -22.2256 | -1.75324 | 0.000002 |
| C | -22.7161 | 1.845391 | -5.8E-05 |
| H | -20.7478 | 2.645022 | 0.000042 |
| C | -24.1341 | -0.43156 | -0.00008 |
| N | -23.6425 | -1.71459 | -7.4E-05 |
| O | -21.5661 | -2.78282 | 0.000003 |
| O | -23.3606 | 2.87142  | -0.00016 |
| H | -24.1951 | -2.55659 | -0.00012 |
| C | 24.56041 | -0.18517 | 0.000074 |
| S | 23.34329 | -1.4163  | -7.9E-05 |
| C | 24.04686 | 1.080675 | 0.000188 |
| C | 22.0936  | -0.22455 | 0.000018 |
| C | 22.62828 | 1.050523 | 0.000152 |
| H | 24.65453 | 1.976936 | 0.000291 |
| C | 20.66387 | -0.26775 | -7E-06   |
| S | 21.3969  | 2.285685 | 0.000241 |
| C | 20.1383  | 1.058108 | 0.000109 |
| C | 19.79543 | -1.3622  | -0.00012 |
| C | 18.77603 | 1.30327  | 0.00011  |
| C | 18.43182 | -1.11864 | -0.00011 |
| H | 20.18531 | -2.37543 | -0.00022 |
| C | 17.90751 | 0.207303 | -2E-06   |
| H | 18.38656 | 2.31677  | 0.000192 |
| S | 17.17632 | -2.34928 | -0.00024 |
| C | 16.48128 | 0.163239 | -3.1E-05 |
| C | 15.94183 | -1.11685 | -0.00014 |
| S | 15.24279 | 1.36154  | 0.000059 |
| C | 14.53707 | -1.15651 | -0.00014 |
| C | 14.00347 | 0.12179  | -2.3E-05 |
| H | 13.90843 | -2.0437  | -0.00018 |
| C | 12.61402 | 0.442093 | 0.000015 |
| C | 11.52384 | -0.41172 | -4.5E-05 |
| N | 12.11052 | 1.730391 | 0.000113 |
| C | 10.33818 | 0.365883 | 0.000008 |
| C | 11.16588 | -1.817   | -0.00018 |
| C | 10.6969  | 1.771755 | 0.000071 |
| H | 12.65668 | 2.577565 | 0.000118 |

|   |          |          |          |
|---|----------|----------|----------|
| S | 4.445489 | -6.47438 | 1.43093  |
| C | 5.159234 | -6.29014 | -1.09478 |
| C | 5.580266 | -5.92872 | 0.178659 |
| H | 5.698965 | -5.99286 | -1.98791 |
| C | 6.595102 | -4.96605 | 0.487822 |
| C | 7.273564 | -4.11542 | -0.37818 |
| N | 6.837049 | -4.4977  | 1.777383 |
| C | 7.792596 | -3.01881 | 0.378535 |
| C | 7.287215 | -3.75886 | -1.79139 |
| C | 7.52507  | -3.25511 | 1.79172  |
| H | 6.499091 | -4.91431 | 2.633592 |
| C | 8.020972 | -1.95502 | -0.4875  |
| N | 7.812327 | -2.43914 | -1.7771  |
| O | 6.95518  | -4.35377 | -2.80876 |
| O | 7.774577 | -2.62121 | 2.809108 |
| H | 7.920078 | -1.91359 | -2.6333  |
| C | 8.12273  | -0.55995 | -0.17846 |
| S | 7.82586  | 0.663559 | -1.43088 |
| C | 8.135852 | -0.00504 | 1.094902 |
| C | 7.622702 | 1.889294 | -0.21549 |
| C | 7.831289 | 1.371439 | 1.059937 |
| H | 8.247883 | -0.61083 | 1.98811  |
| C | 7.050692 | 3.199723 | -0.24473 |
| S | 7.404528 | 2.525185 | 2.320496 |
| C | 6.799278 | 3.652783 | 1.089912 |
| C | 6.597611 | 3.95085  | -1.33988 |
| C | 6.026676 | 4.777296 | 1.339519 |
| C | 5.818411 | 5.070801 | -1.09028 |
| H | 6.787263 | 3.611882 | -2.35396 |
| C | 5.483638 | 5.466229 | 0.244392 |
| H | 5.776776 | 5.07459  | 2.353609 |
| S | 4.976801 | 6.034938 | -2.32082 |
| C | 4.459514 | 6.464022 | 0.215228 |
| C | 4.048352 | 6.84179  | -1.06017 |
| S | 3.384678 | 7.087042 | 1.430733 |
| C | 2.868026 | 7.612701 | -1.09501 |
| C | 2.34452  | 7.796633 | 0.178424 |
| H | 2.340618 | 7.931293 | -1.98815 |
| C | 1.00337  | 8.194061 | 0.487615 |
| C | -0.07259 | 8.356109 | -0.37834 |
| N | 0.476866 | 8.16947  | 1.777196 |
| C | -1.28181 | 8.257532 | 0.378454 |
| C | -0.38828 | 8.189533 | -1.79151 |
| C | -0.94327 | 8.144252 | 1.791623 |
| H | 1.006667 | 8.084469 | 2.633328 |

|   |          |          |          |
|---|----------|----------|----------|
| C | 9.248427 | -0.48711 | -5.5E-05 |
| N | 9.751569 | -1.77546 | -9.1E-05 |
| O | 11.8203  | -2.84742 | -0.00042 |
| O | 10.04188 | 2.801647 | 0.000142 |
| H | 9.205937 | -2.62296 | -0.00016 |
| H | 25.60292 | -0.4735  | 0.00007  |
| H | -25.1984 | -0.23862 | -0.00016 |

|   |          |          |          |
|---|----------|----------|----------|
| C | -2.31731 | 7.92338  | -0.48753 |
| N | -1.79374 | 7.984395 | -1.77711 |
| O | 0.292722 | 8.199892 | -2.80901 |
| O | -1.61693 | 8.04378  | 2.809104 |
| H | -2.3028  | 7.814988 | -2.63328 |
|   |          |          |          |
|   |          |          |          |

| DTBDT-BT |          |          |          |
|----------|----------|----------|----------|
| Linear   |          |          |          |
| C        | -5.34966 | -1.78932 | 0.000171 |
| C        | -5.22117 | -0.41163 | 0.000016 |
| S        | -3.80309 | -2.59709 | 0.000339 |
| C        | -3.87354 | 0.059397 | 0.000022 |
| C        | -2.97303 | -1.04712 | 0.000197 |
| C        | -2.00138 | 1.542769 | -7.8E-05 |
| C        | -1.10089 | 0.436287 | 0.000103 |
| S        | -1.17141 | 3.09282  | -0.00024 |
| C        | 0.246746 | 0.907364 | 0.000097 |
| C        | 0.375174 | 2.285127 | -7.2E-05 |
| C        | -3.37432 | 1.365578 | -0.00012 |
| C        | -1.60011 | -0.86992 | 0.000236 |
| H        | -4.05137 | 2.214285 | -0.00026 |
| H        | -0.92306 | -1.71863 | 0.000368 |
| S        | 1.792107 | 0.144001 | 0.000296 |
| C        | 1.708043 | 2.745126 | -5.4E-05 |
| H        | 2.020162 | 3.780228 | -0.00017 |
| C        | 2.611699 | 1.701392 | 0.000131 |
| C        | -6.68261 | -2.24937 | 0.000181 |
| S        | -6.76659 | 0.351741 | -0.00014 |
| H        | -6.99483 | -3.28444 | 0.000265 |
| C        | -7.58618 | -1.20565 | 0.000058 |
| C        | -13.4355 | -1.27685 | -0.00005 |
| S        | -14.2929 | 0.260173 | -0.00015 |
| C        | -14.3137 | -2.34189 | -9E-06   |
| C        | -15.8192 | -0.54036 | -8.6E-05 |
| C        | -15.6576 | -1.91425 | -2.4E-05 |
| H        | -13.9769 | -3.36923 | 0.000008 |
| C        | -17.1786 | -0.10176 | -6.4E-05 |

| DTBDT-BT   |          |          |          |
|------------|----------|----------|----------|
| Macrocycle |          |          |          |
| C          | 1.453266 | -7.59635 | -1.40999 |
| C          | 0.966125 | -7.65464 | -0.11306 |
| S          | 0.161149 | -7.56939 | -2.60749 |
| C          | -0.46199 | -7.61421 | -0.00807 |
| C          | -1.04561 | -7.4776  | -1.30778 |
| C          | -2.60878 | -7.19358 | 0.967009 |
| C          | -3.16459 | -6.94285 | -0.32783 |
| S          | -3.7482  | -6.82507 | 2.278516 |
| C          | -4.45376 | -6.33163 | -0.19862 |
| C          | -4.88507 | -6.16029 | 1.108068 |
| C          | -1.27237 | -7.52744 | 1.133556 |
| C          | -2.38269 | -7.14656 | -1.47443 |
| H          | -0.83854 | -7.63485 | 2.123255 |
| H          | -2.79807 | -6.96342 | -2.46091 |
| S          | -5.45711 | -5.43597 | -1.3051  |
| C          | -5.99959 | -5.30159 | 1.251746 |
| H          | -6.43459 | -5.00314 | 2.194969 |
| C          | -6.40681 | -4.76242 | 0.042965 |
| C          | 2.840142 | -7.33637 | -1.50635 |
| S          | 2.246944 | -7.41074 | 1.041679 |
| H          | 3.381813 | -7.19643 | -2.431   |
| C          | 3.425726 | -7.14258 | -0.26655 |
| C          | 7.36543  | -3.079   | 0.461962 |
| S          | 7.184949 | -2.08851 | 1.933043 |
| C          | 7.862684 | -2.32063 | -0.58466 |
| C          | 7.670123 | -0.65546 | 1.072203 |
| C          | 8.006747 | -0.95646 | -0.23898 |
| H          | 8.015771 | -2.72981 | -1.57316 |
| C          | 7.510209 | 0.741837 | 1.343566 |

|   |          |          |          |
|---|----------|----------|----------|
| S | -17.1846 | -2.7587  | 0.000064 |
| C | -18.0516 | -1.22903 | 0.000018 |
| C | -17.7096 | 1.191299 | -0.00012 |
| C | -19.4293 | -1.08496 | 0.000046 |
| C | -19.0871 | 1.334004 | -9.1E-05 |
| H | -17.054  | 2.056723 | -0.00019 |
| C | -19.9602 | 0.207373 | -6E-06   |
| H | -20.085  | -1.95032 | 0.000108 |
| S | -19.9555 | 2.863333 | -0.00016 |
| C | -21.3223 | 0.646408 | 0.000009 |
| C | -21.4821 | 2.019388 | -5.7E-05 |
| S | -22.8539 | -0.15133 | 0.000114 |
| C | -22.8368 | 2.442238 | -1.8E-05 |
| C | -23.6822 | 1.369397 | 0.000073 |
| H | -23.1714 | 3.472165 | -5.9E-05 |
| C | 18.72654 | -0.88252 | -0.00061 |
| S | 17.87006 | 0.653703 | 0.000054 |
| C | 17.85062 | -1.94754 | -0.00099 |
| C | 16.34366 | -0.14714 | -0.00037 |
| C | 16.50557 | -1.52064 | -0.00088 |
| H | 18.18944 | -2.97446 | -0.0013  |
| C | 14.98443 | 0.290894 | -0.0002  |
| S | 14.9794  | -2.36629 | -0.00122 |
| C | 14.11154 | -0.83734 | -0.00065 |
| C | 14.45344 | 1.584274 | 0.000291 |
| C | 12.7345  | -0.6938  | -0.00061 |
| C | 13.07647 | 1.727822 | 0.000333 |
| H | 15.10948 | 2.449325 | 0.000631 |
| C | 12.20348 | 0.599647 | -0.00012 |
| H | 12.0785  | -1.55889 | -0.00096 |
| S | 12.20875 | 3.257107 | 0.000915 |
| C | 10.84453 | 1.037632 | 0.000029 |
| C | 10.68237 | 2.411753 | 0.000548 |
| S | 9.318425 | 0.236577 | -0.0003  |
| C | 9.338569 | 2.83891  | 0.000695 |
| C | 8.460796 | 1.773346 | 0.00027  |
| H | 9.001222 | 3.866063 | 0.001038 |
| C | -11.2212 | -2.50968 | -0.00013 |
| C | -9.76962 | -2.49207 | -8.2E-05 |
| C | -9.03536 | -1.25651 | 0.000062 |
| C | -9.82076 | -0.11693 | 0.000164 |
| C | -11.2282 | -0.13393 | 0.000125 |
| C | -11.9857 | -1.29236 | -2.4E-05 |
| H | -9.33973 | 0.857176 | 0.000296 |
| H | -11.7328 | 0.828116 | 0.000249 |

|   |          |          |          |
|---|----------|----------|----------|
| S | 8.239503 | 0.491422 | -1.216   |
| C | 7.70919  | 1.500014 | 0.146689 |
| C | 7.04425  | 1.377972 | 2.504175 |
| C | 7.348914 | 2.837735 | 0.064178 |
| C | 6.677016 | 2.712765 | 2.418628 |
| H | 6.89246  | 0.809734 | 3.417031 |
| C | 6.770058 | 3.441098 | 1.19041  |
| H | 7.424717 | 3.383894 | -0.87134 |
| S | 5.857742 | 3.637348 | 3.696687 |
| C | 6.0502   | 4.67706  | 1.29142  |
| C | 5.469429 | 4.902927 | 2.531902 |
| S | 5.440295 | 5.78644  | 0.098605 |
| C | 4.512856 | 5.939474 | 2.539571 |
| C | 4.320814 | 6.497463 | 1.283614 |
| H | 3.911219 | 6.191711 | 3.403722 |
| C | -0.91414 | 7.853021 | -0.52204 |
| S | -2.23389 | 7.630319 | 0.654821 |
| C | -1.34267 | 7.557579 | -1.80546 |
| C | -3.29156 | 7.028136 | -0.59017 |
| C | -2.67053 | 7.07052  | -1.82935 |
| H | -0.68243 | 7.60186  | -2.66005 |
| C | -4.49744 | 6.256058 | -0.5508  |
| S | -3.59435 | 6.221791 | -3.06694 |
| C | -4.74771 | 5.671768 | -1.83303 |
| C | -5.28989 | 5.893996 | 0.54866  |
| C | -5.68735 | 4.665131 | -2.00302 |
| C | -6.22464 | 4.882634 | 0.380189 |
| H | -5.10809 | 6.335058 | 1.524186 |
| C | -6.39447 | 4.219206 | -0.87648 |
| H | -5.81279 | 4.168744 | -2.96067 |
| S | -7.16338 | 4.122257 | 1.682339 |
| C | -7.1799  | 3.033716 | -0.70337 |
| C | -7.62066 | 2.814785 | 0.593017 |
| S | -7.40661 | 1.61312  | -1.68377 |
| C | -8.12198 | 1.513851 | 0.832168 |
| C | -8.02606 | 0.699867 | -0.28404 |
| H | -8.44956 | 1.141912 | 1.792535 |
| C | 6.640959 | -5.1215  | -0.85532 |
| C | 5.629852 | -6.15894 | -1.04177 |
| C | 4.695291 | -6.48668 | 0.008682 |
| C | 4.99872  | -5.92284 | 1.242021 |
| C | 5.976527 | -4.91932 | 1.422299 |
| C | 6.734501 | -4.38806 | 0.38546  |
| H | 4.371432 | -6.14902 | 2.099015 |
| H | 6.024529 | -4.46005 | 2.40527  |

|   |          |          |          |
|---|----------|----------|----------|
| C | 20.93154 | -2.13069 | 0.000169 |
| C | 22.37907 | -2.10754 | 0.000111 |
| C | 23.09151 | -0.8818  | -0.00084 |
| C | 22.354   | 0.269886 | -0.00172 |
| C | 20.93499 | 0.256393 | -0.0017  |
| C | 20.1808  | -0.90205 | -0.00073 |
| H | 22.85638 | 1.232401 | -0.0025  |
| H | 20.42668 | 1.216706 | -0.00257 |
| N | -9.23691 | -3.71391 | -0.00022 |
| N | -11.724  | -3.74409 | -0.00022 |
| N | 22.93073 | -3.32385 | 0.001032 |
| N | 20.4329  | -3.3679  | 0.001114 |
| S | -10.4679 | -4.77367 | -0.00035 |
| S | 21.70264 | -4.38625 | 0.001877 |
| C | 7.010932 | 1.788669 | 0.000284 |
| C | 6.253675 | 0.630093 | 0.000333 |
| C | 6.246498 | 3.005919 | 0.000221 |
| C | 4.846283 | 0.612788 | 0.000269 |
| H | 6.758411 | -0.33191 | 0.000448 |
| C | 4.794952 | 2.988065 | 0.000172 |
| C | 4.060747 | 1.75237  | 0.000187 |
| H | 4.365389 | -0.36136 | 0.000281 |
| N | 6.749133 | 4.240409 | 0.000188 |
| N | 4.262087 | 4.209812 | 0.000121 |
| S | 5.492772 | 5.269785 | 0.000145 |
| H | -24.7638 | 1.381868 | 0.000114 |
| H | 24.17525 | -0.88576 | -0.00086 |

|   |          |          |          |
|---|----------|----------|----------|
| C | 1.577282 | 7.973382 | -0.97454 |
| C | 2.915528 | 7.630072 | -0.50742 |
| C | 3.16972  | 7.28759  | 0.867236 |
| C | 2.111697 | 7.563336 | 1.727287 |
| C | 0.815512 | 7.899131 | 1.279935 |
| C | 0.459318 | 7.988994 | -0.06232 |
| H | 2.229023 | 7.387105 | 2.791141 |
| H | 0.040256 | 7.95233  | 2.038656 |
| N | 5.661204 | -6.70921 | -2.25716 |
| N | 7.397503 | -4.92816 | -1.93748 |
| N | 3.82939  | 7.625984 | -1.47858 |
| N | 1.529538 | 8.214302 | -2.28697 |
| S | 6.87555  | -5.97841 | -3.08921 |
| S | 3.0553   | 8.02838  | -2.87113 |
| C | -8.06812 | -0.75429 | -0.32364 |
| C | -7.61956 | -1.49015 | -1.41401 |
| C | -8.34447 | -1.54423 | 0.853483 |
| C | -7.21597 | -2.8416  | -1.33314 |
| H | -7.43173 | -0.98368 | -2.35616 |
| C | -7.9268  | -2.94129 | 0.937297 |
| C | -7.22799 | -3.57738 | -0.1543  |
| H | -6.74693 | -3.26186 | -2.2177  |
| N | -8.94736 | -1.11116 | 1.962494 |
| N | -8.23005 | -3.50993 | 2.105885 |
| S | -8.98789 | -2.37137 | 3.017104 |

**Table S3.** Cartesian coordinates of the molecular junctions for the molecules [PT]<sub>10</sub>, [TT-DPP]<sub>3</sub>, [BDT-DPP]<sub>3</sub>, [DTBDT-DPP]<sub>3</sub>, and [DTBDT-BT]<sub>3</sub>.

| PT (Polythiophene) |           |           |           |
|--------------------|-----------|-----------|-----------|
| AU-MC              |           |           |           |
|                    | X         | Y         | Z         |
| C                  | 4.722123  | 5.810803  | 0.298472  |
| C                  | 4.476485  | 6.691319  | 1.325548  |
| C                  | 3.286214  | 7.439367  | 1.149227  |
| C                  | 2.614195  | 7.12725   | -0.010252 |
| S                  | 3.473059  | 5.912029  | -0.902302 |
| H                  | 5.127217  | 6.778691  | 2.188673  |
| H                  | 2.917575  | 8.170496  | 1.86025   |
| C                  | 1.253886  | 7.449894  | -0.408204 |
| C                  | 0.709721  | 7.63136   | -1.658679 |
| S                  | 0.00109   | 7.287039  | 0.780914  |
| C                  | -0.707614 | 7.631824  | -1.658593 |
| H                  | 1.315958  | 7.742737  | -2.550997 |
| C                  | -1.251745 | 7.450717  | -0.408053 |
| H                  | -1.313887 | 7.743593  | -2.550838 |
| C                  | -3.283946 | 7.441466  | 1.149585  |
| C                  | -2.612206 | 7.128902  | -0.009936 |
| C                  | -4.474608 | 6.694081  | 1.326071  |
| C                  | -4.720813 | 5.813607  | 0.299088  |
| C                  | -5.647421 | 4.691613  | 0.241046  |
| C                  | -6.423912 | 4.21126   | -0.787496 |
| S                  | -5.602285 | 3.556269  | 1.550593  |
| C                  | -6.976338 | 2.930765  | -0.524226 |
| H                  | -6.578345 | 4.75868   | -1.710488 |
| C                  | -6.61862  | 2.43366   | 0.706652  |
| H                  | -7.606665 | 2.382539  | -1.217169 |
| C                  | -6.705647 | 1.069628  | 1.244313  |
| C                  | -6.875172 | 0.688438  | 2.592753  |
| S                  | -5.744647 | -0.153628 | 0.42369   |
| C                  | -6.268106 | -0.553762 | 2.914689  |
| H                  | -7.300651 | 1.362923  | 3.329788  |
| C                  | -5.610355 | -1.128605 | 1.850646  |
| H                  | -6.306311 | -1.004442 | 3.899567  |
| C                  | -4.700966 | -2.260437 | 1.815782  |
| C                  | -4.470631 | -3.168698 | 0.80764   |
| S                  | -3.452757 | -2.349262 | 3.017639  |
| C                  | -3.291794 | -3.927971 | 1.001055  |
| H                  | -5.125282 | -3.270046 | -0.051273 |

|    |            |           |           |
|----|------------|-----------|-----------|
| C  | -2.612556  | -3.595145 | 2.151258  |
| H  | -2.934626  | -4.680951 | 0.30741   |
| C  | -1.253507  | -3.916798 | 2.553171  |
| C  | -0.71008   | -4.072551 | 3.807843  |
| C  | 0.706636   | -4.072937 | 3.807702  |
| C  | 1.249897   | -3.917469 | 2.552923  |
| H  | 1.31313    | -4.166946 | 4.701815  |
| C  | 2.609052   | -3.596591 | 2.150747  |
| C  | 3.287902   | -3.929885 | 1.000454  |
| S  | 3.45013    | -2.351149 | 3.016914  |
| C  | 4.46715    | -3.171304 | 0.806791  |
| H  | 2.930183   | -4.682701 | 0.306916  |
| C  | 4.698194   | -2.263136 | 1.814846  |
| H  | 5.121587   | -3.27308  | -0.052232 |
| C  | 5.608307   | -1.131864 | 1.849533  |
| C  | 6.266847   | -0.557594 | 2.913381  |
| S  | 5.742707   | -0.156826 | 0.422623  |
| C  | 6.874636   | 0.684263  | 2.591348  |
| H  | 6.305139   | -1.008406 | 3.898194  |
| C  | 6.70482    | 1.065729  | 1.243003  |
| H  | 7.300629   | 1.358482  | 3.328333  |
| C  | 6.976723   | 2.927234  | -0.52504  |
| C  | 6.618337   | 2.429883  | 0.705537  |
| C  | 6.424871   | 4.208026  | -0.788127 |
| C  | 5.648184   | 4.688349  | 0.240276  |
| S  | 5.602108   | 3.552609  | 1.549438  |
| S  | -0.001884  | -3.780535 | 1.360173  |
| H  | 7.607111   | 2.378972  | -1.2179   |
| H  | 6.579866   | 4.755686  | -1.710881 |
| H  | -1.316447  | -4.166229 | 4.702077  |
| S  | -3.471805  | 5.914068  | -0.901806 |
| H  | -5.125219  | 6.781888  | 2.189244  |
| H  | -2.914842  | 8.172444  | 1.86052   |
| Au | -13.094527 | -0.176528 | -0.230083 |
| Au | -11.716778 | 1.371881  | -2.695353 |
| Au | -13.602822 | 2.602215  | -0.933906 |
| Au | -14.413848 | 0.55579   | -2.713607 |
| Au | -12.308795 | -1.402074 | -2.770568 |
| Au | -10.062052 | -0.37671  | -1.317648 |
| Au | -10.961239 | 1.944597  | -0.05609  |
| Au | -12.993387 | -2.021291 | 2.43569   |
| Au | -14.396807 | 0.463299  | 2.298395  |
| Au | -15.286254 | -1.77467  | 0.812922  |
| Au | -12.946807 | -3.102563 | -0.186259 |
| Au | -10.623762 | -1.907244 | 0.987766  |

|    |            |           |           |
|----|------------|-----------|-----------|
| Au | -11.539855 | 0.379453  | 2.287202  |
| Au | -12.903134 | 2.774945  | 1.777589  |
| Au | -15.743497 | 0.834626  | -0.211895 |
| Au | -14.902284 | -2.0695   | -1.923262 |
| Au | -10.477899 | -3.14478  | -1.528685 |
| Au | -8.92243   | 0.356427  | 1.186441  |
| Au | 13.094506  | -0.172006 | -0.227805 |
| Au | 11.717651  | 1.375817  | -2.693255 |
| Au | 13.601316  | 2.606915  | -0.929644 |
| Au | 10.959453  | 1.944794  | -0.053126 |
| Au | 10.064566  | -0.376184 | -1.317905 |
| Au | 12.312807  | -1.397429 | -2.770835 |
| Au | 14.415817  | 0.562678  | -2.709728 |
| Au | 12.991822  | -2.02944  | 2.431328  |
| Au | 14.394884  | 0.456248  | 2.304677  |
| Au | 11.537807  | 0.371995  | 2.286563  |
| Au | 10.622185  | -1.913122 | 0.983741  |
| Au | 12.947933  | -3.099176 | -0.195123 |
| Au | 15.285698  | -1.774856 | 0.81101   |
| Au | 15.741737  | 0.838608  | -0.204802 |
| Au | 12.902357  | 2.767947  | 1.782458  |
| Au | 8.921061   | 0.350825  | 1.185071  |
| Au | 10.479247  | -3.143515 | -1.53705  |
| Au | 14.907148  | -2.063696 | -1.926168 |

| <b>TT-DPP</b> |          |          |          |
|---------------|----------|----------|----------|
| <b>AU-MC</b>  |          |          |          |
|               | X        | Y        | Z        |
| C             | 1.461461 | -3.66873 | 4.06646  |
| C             | 2.281098 | -3.45572 | 5.157426 |
| S             | 2.260604 | -3.21542 | 2.598062 |
| C             | 3.537258 | -2.91403 | 4.820207 |
| H             | 1.966875 | -3.66561 | 6.173753 |
| C             | 3.682043 | -2.70549 | 3.459901 |
| H             | 4.295281 | -2.61898 | 5.536548 |
| C             | 4.666492 | -1.91015 | 2.786041 |
| C             | 5.456264 | -0.90489 | 3.302606 |
| N             | 4.707057 | -1.81227 | 1.40344  |
| C             | 5.391448 | -0.10996 | 4.518087 |
| C             | 5.895882 | -0.05893 | 2.200016 |
| C             | 5.356541 | -0.65794 | 0.951321 |
| H             | 4.327813 | -2.48733 | 0.755539 |
| N             | 5.650783 | 1.205797 | 4.049507 |

|   |           |          |           |
|---|-----------|----------|-----------|
| C | 5.829457  | 1.274929 | 2.693163  |
| H | 5.727141  | 1.986001 | 4.686663  |
| C | 5.644292  | 2.478899 | 1.951289  |
| C | 5.823792  | 2.687109 | 0.590982  |
| S | 4.746522  | 3.787637 | 2.667435  |
| C | 5.21982   | 3.873482 | 0.138969  |
| H | 6.342338  | 1.977669 | -0.044586 |
| C | 4.575413  | 4.581007 | 1.138616  |
| H | 5.228614  | 4.197794 | -0.895569 |
| C | 3.623046  | 5.666508 | 1.043301  |
| C | 3.302725  | 6.631472 | 1.979001  |
| S | 2.438404  | 5.618182 | -0.22194  |
| C | 2.101936  | 7.310265 | 1.699372  |
| H | 3.910594  | 6.816494 | 2.857952  |
| C | 1.490864  | 6.859009 | 0.541543  |
| H | 1.638927  | 8.046865 | 2.347222  |
| C | 0.133592  | 7.073349 | 0.134499  |
| C | -0.934814 | 7.45314  | 0.925804  |
| N | -0.384074 | 6.578509 | -1.050477 |
| C | -1.210078 | 7.6571   | 2.342737  |
| C | -2.13232  | 7.018976 | 0.281034  |
| C | -1.793479 | 6.483401 | -1.032056 |
| H | 0.150786  | 6.337    | -1.870791 |
| N | -2.560406 | 7.259769 | 2.455993  |
| C | -3.08594  | 6.804739 | 1.258069  |
| H | -3.067979 | 7.353921 | 3.322438  |
| C | -4.236222 | 5.952076 | 1.188854  |
| C | -4.852439 | 5.454505 | 0.05375   |
| S | -4.757585 | 5.096256 | 2.609248  |
| C | -5.708926 | 4.370587 | 0.330818  |
| H | -4.616985 | 5.82088  | -0.939617 |
| C | -5.759515 | 4.03875  | 1.670719  |
| H | -6.258032 | 3.821325 | -0.427056 |
| C | -6.255025 | 2.826138 | 2.290601  |
| C | -6.763506 | 2.610257 | 3.551504  |
| S | -5.942855 | 1.327459 | 1.467879  |
| C | -6.89667  | 1.234882 | 3.884147  |
| H | -7.016275 | 3.415771 | 4.231265  |
| C | -6.479416 | 0.387067 | 2.84221   |
| H | -7.0843   | 0.861007 | 4.88673   |
| C | -6.029822 | -0.98075 | 2.934241  |
| C | -5.464205 | -1.6089  | 4.020749  |
| N | -5.757636 | -1.73816 | 1.80908   |
| C | -4.996481 | -1.25063 | 5.355943  |
| C | -4.690043 | -2.70502 | 3.533843  |

|    |            |          |           |
|----|------------|----------|-----------|
| C  | -4.917337  | -2.83805 | 2.098143  |
| H  | -6.250977  | -1.65421 | 0.927049  |
| N  | -3.910105  | -2.12861 | 5.546564  |
| C  | -3.673399  | -2.93484 | 4.442845  |
| H  | -3.41174   | -2.17233 | 6.422485  |
| C  | -2.420067  | -3.58839 | 4.215308  |
| C  | -2.079553  | -4.39925 | 3.145645  |
| S  | -1.007087  | -3.10037 | 5.102474  |
| C  | -0.689775  | -4.59494 | 3.033709  |
| H  | -2.818814  | -4.7644  | 2.439999  |
| C  | 0.040143   | -3.94517 | 4.010172  |
| H  | -0.222686  | -5.1729  | 2.243922  |
| O  | -4.532887  | -3.65125 | 1.277584  |
| O  | -5.38285   | -0.43005 | 6.167628  |
| O  | 5.158304   | -0.38187 | 5.677881  |
| O  | 5.429379   | -0.31223 | -0.211643 |
| O  | -0.529431  | 8.061725 | 3.267892  |
| O  | -2.468849  | 6.047789 | -1.946063 |
| Au | 11.576003  | -0.06046 | -0.77481  |
| Au | 12.509685  | 1.996602 | 1.591254  |
| Au | 11.866841  | 2.84899  | -1.048227 |
| Au | 14.156609  | 1.264897 | -0.605507 |
| Au | 13.526672  | -0.6229  | 1.423367  |
| Au | 10.887898  | -0.09472 | 2.431837  |
| Au | 9.83481    | 1.81635  | 0.685238  |
| Au | 10.073449  | -2.64886 | -1.83356  |
| Au | 10.245493  | -0.24892 | -3.353041 |
| Au | 12.569387  | -1.79707 | -2.869837 |
| Au | 12.371441  | -2.8718  | -0.222563 |
| Au | 9.809243   | -2.17193 | 0.878733  |
| Au | 8.65868    | -0.37112 | -0.937384 |
| Au | 9.383017   | 2.080016 | -2.061939 |
| Au | 12.778528  | 1.050053 | -3.083033 |
| Au | 14.635882  | -1.4317  | -1.037201 |
| Au | 12.009143  | -2.68119 | 2.561724  |
| Au | 8.144832   | -0.12828 | 1.920126  |
| Au | -11.283326 | -0.48104 | -0.861547 |
| Au | -10.302053 | 2.495644 | -1.507773 |
| Au | -9.366269  | 0.214569 | -2.937169 |
| Au | -8.651573  | 0.642496 | -0.180938 |
| Au | -10.703886 | 2.002683 | 1.184584  |
| Au | -12.927685 | 1.985276 | -0.638006 |
| Au | -12.059033 | 1.043365 | -3.195371 |
| Au | -12.249954 | -2.81577 | 1.188984  |
| Au | -10.65942  | -3.32141 | -1.133541 |

|    |            |          |           |
|----|------------|----------|-----------|
| Au | -9.578221  | -1.89556 | 1.093069  |
| Au | -11.563029 | -0.39726 | 2.381279  |
| Au | -13.844538 | -0.56685 | 0.659801  |
| Au | -13.327393 | -2.4468  | -1.421177 |
| Au | -11.399955 | -1.73563 | -3.39827  |
| Au | -8.28214   | -1.84857 | -1.375513 |
| Au | -8.928213  | 0.364953 | 2.699614  |
| Au | -13.353839 | 1.765763 | 2.131827  |
| Au | -14.391574 | 0.034238 | -2.037296 |

| <b>BDT-DPP</b> |          |          |          |
|----------------|----------|----------|----------|
| <b>AU-MC</b>   |          |          |          |
|                | X        | Y        | Z        |
| C              | -3.66801 | -4.23058 | -1.52848 |
| C              | -4.40503 | -3.76918 | -0.44699 |
| C              | -4.29404 | -3.64354 | 0.998226 |
| C              | -5.31426 | -2.78213 | -0.92211 |
| C              | -5.21481 | -2.71598 | -2.37265 |
| H              | -3.89556 | -3.80808 | -3.60716 |
| C              | -5.68548 | -1.98585 | 0.148881 |
| H              | -5.26124 | -2.21604 | 2.227142 |
| C              | -6.17596 | -0.62938 | 0.128569 |
| C              | -6.34779 | 0.131197 | -1.0482  |
| S              | -5.92875 | 0.400236 | 1.541778 |
| C              | -6.08039 | 1.528042 | -0.83068 |
| H              | -6.28673 | -0.34069 | -2.03054 |
| C              | -5.80766 | 1.826981 | 0.534902 |
| C              | -5.26521 | 3.685136 | -1.42027 |
| C              | -4.99354 | 3.987467 | -0.05309 |
| S              | -4.54898 | 4.872171 | -2.47718 |
| C              | -4.17036 | 5.140589 | 0.093333 |
| C              | -3.76493 | 5.658764 | -1.11318 |
| H              | -3.76179 | 5.491383 | 1.038155 |
| C              | -2.58789 | 6.455889 | -1.31754 |
| C              | -1.63374 | 6.842698 | -0.38908 |
| C              | -1.33972 | 6.673807 | 1.026193 |
| C              | -0.41219 | 7.082993 | -1.08331 |
| C              | -0.65593 | 6.954329 | -2.51247 |
| H              | -2.4727  | 6.41789  | -3.4477  |
| C              | 0.630226 | 6.952962 | -0.17852 |
| H              | 0.566928 | 6.682307 | 1.93642  |
| C              | 2.001266 | 6.611283 | -0.43631 |
| C              | 2.527994 | 6.351414 | -1.679   |

|   |          |          |          |
|---|----------|----------|----------|
| S | 3.031226 | 6.027105 | 0.864441 |
| C | 3.683153 | 5.521327 | -1.62339 |
| H | 2.006282 | 6.621458 | -2.59423 |
| C | 4.070883 | 5.219509 | -0.28205 |
| C | 5.133593 | 3.792489 | -2.38452 |
| C | 5.521085 | 3.490122 | -1.04398 |
| S | 5.689437 | 2.5632   | -3.49083 |
| C | 6.201564 | 2.245295 | -0.94542 |
| C | 6.269791 | 1.580384 | -2.15014 |
| H | 6.502882 | 1.781552 | -0.00984 |
| C | 6.396942 | 0.163951 | -2.30414 |
| C | 6.551749 | -0.84547 | -1.30937 |
| C | 6.301119 | -0.89142 | 0.150118 |
| C | 5.977623 | -2.05644 | -1.87358 |
| C | 5.701058 | -1.83457 | -3.28052 |
| H | 5.905224 | -0.02038 | -4.35692 |
| C | 5.397307 | -2.78337 | -0.85061 |
| H | 5.431003 | -2.44581 | 1.257489 |
| C | 4.34951  | -3.76733 | -0.9015  |
| C | 3.667802 | -4.1521  | -2.03067 |
| S | 3.512767 | -4.2329  | 0.575021 |
| C | 2.374606 | -4.67613 | -1.74213 |
| H | 4.030272 | -3.92696 | -3.03014 |
| C | 2.121119 | -4.75171 | -0.3398  |
| C | 0.052227 | -5.03983 | -2.13231 |
| C | -0.20013 | -5.11743 | -0.72922 |
| S | -1.44127 | -4.93997 | -3.03076 |
| C | -1.58845 | -5.03878 | -0.42381 |
| C | -2.36688 | -4.83436 | -1.53833 |
| H | -1.99708 | -4.98451 | 0.582795 |
| O | 5.242853 | -2.5345  | -4.16399 |
| O | 6.504808 | -0.08814 | 1.043798 |
| O | -3.63109 | -4.23118 | 1.835526 |
| O | -5.76468 | -2.01754 | -3.20934 |
| O | -2.03645 | 6.429324 | 1.99677  |
| O | 0.066917 | 7.04264  | -3.49083 |
| C | -5.85477 | 2.49562  | -1.81625 |
| C | -5.32926 | 3.05783  | 0.944435 |
| H | -5.08966 | 3.261215 | 1.983127 |
| H | -6.02677 | 2.26129  | -2.86191 |
| C | 5.020032 | 4.260798 | 0.018265 |
| C | 4.27527  | 4.83185  | -2.6927  |
| H | 3.956911 | 5.028404 | -3.71132 |
| H | 5.280265 | 4.011834 | 1.042131 |
| C | 1.324622 | -4.88129 | -2.6507  |

|    |          |          |          |
|----|----------|----------|----------|
| C  | 0.868214 | -5.02799 | 0.176189 |
| H  | 1.499765 | -4.7867  | -3.71758 |
| H  | 0.680756 | -5.04611 | 1.244967 |
| N  | -5.16895 | -2.5729  | 1.288311 |
| N  | -4.23921 | -3.68729 | -2.66653 |
| N  | -2.03074 | 6.644629 | -2.57001 |
| N  | 0.061101 | 6.833662 | 1.077131 |
| N  | 6.048941 | -0.47345 | -3.46603 |
| N  | 5.726458 | -2.1508  | 0.338471 |
| Au | -12.8169 | 0.095651 | 0.360832 |
| Au | -12.467  | 1.591867 | -2.47973 |
| Au | -12.9198 | 2.981749 | -0.02433 |
| Au | -14.9439 | 1.352057 | -1.14874 |
| Au | -13.6607 | -0.96117 | -2.25749 |
| Au | -10.8215 | -0.61125 | -2.10379 |
| Au | -10.4347 | 1.657742 | -0.5292  |
| Au | -11.9941 | -2.11512 | 2.549183 |
| Au | -12.6174 | 0.588647 | 3.223596 |
| Au | -14.6261 | -1.15056 | 2.243221 |
| Au | -13.4321 | -2.78012 | 0.207261 |
| Au | -10.602  | -2.28037 | 0.155359 |
| Au | -10.2108 | -0.06731 | 1.80916  |
| Au | -11.0574 | 2.588183 | 2.032779 |
| Au | -14.7924 | 1.637495 | 1.681649 |
| Au | -15.6919 | -1.19346 | -0.3273  |
| Au | -11.9484 | -3.18718 | -2.14493 |
| Au | -8.52418 | -0.47459 | -0.48197 |
| Au | 12.69385 | -0.14249 | 0.586918 |
| Au | 11.30257 | 2.687234 | 0.993546 |
| Au | 11.76282 | 0.867378 | 3.142071 |
| Au | 9.804346 | 0.310829 | 1.100191 |
| Au | 10.63142 | 1.390323 | -1.35483 |
| Au | 13.3248  | 2.296726 | -0.94227 |
| Au | 13.93391 | 2.160002 | 1.863004 |
| Au | 13.1916  | -2.94161 | -1.04802 |
| Au | 12.97601 | -2.79201 | 1.79546  |
| Au | 10.70535 | -2.30852 | 0.137845 |
| Au | 11.46741 | -1.14212 | -2.28035 |
| Au | 14.22734 | -0.46457 | -1.92903 |
| Au | 15.19053 | -1.64417 | 0.483218 |
| Au | 14.27864 | -0.48247 | 2.904101 |
| Au | 10.64422 | -1.68731 | 2.86422  |
| Au | 8.841926 | -0.83454 | -1.40158 |
| Au | 12.53152 | 1.201299 | -3.41553 |
| Au | 15.6541  | 1.037183 | -0.02176 |

| <b>DTBDT-DPP</b> |          |          |          |
|------------------|----------|----------|----------|
| <b>AU-MC</b>     |          |          |          |
|                  | <b>X</b> | <b>Y</b> | <b>Z</b> |
| C                | -5.34524 | -3.36827 | -2.87825 |
| C                | -6.27657 | -2.93277 | -1.94703 |
| N                | -5.61348 | -2.69946 | -4.06278 |
| C                | -6.50185 | -2.92375 | -0.50822 |
| C                | -7.01555 | -1.86794 | -2.53074 |
| C                | -6.60757 | -1.71344 | -3.91917 |
| H                | -5.1323  | -2.83373 | -4.9387  |
| N                | -7.34075 | -1.80103 | -0.32683 |
| C                | -7.5912  | -1.1332  | -1.51207 |
| H                | -7.81207 | -1.62633 | 0.550652 |
| C                | -8.16901 | 2.385904 | -2.40748 |
| C                | -8.01725 | 2.661973 | -1.05764 |
| S                | -8.00291 | 3.809653 | -3.39469 |
| C                | -7.72885 | 4.027169 | -0.75857 |
| C                | -7.60313 | 4.765044 | -1.97215 |
| C                | -6.90124 | 5.909867 | 0.45154  |
| C                | -6.66579 | 6.605324 | -0.77327 |
| S                | -6.2834  | 6.767612 | 1.855239 |
| C                | -5.86876 | 7.762876 | -0.52113 |
| C                | -5.54981 | 7.962092 | 0.816653 |
| O                | -6.97131 | -0.959   | -4.80665 |
| O                | -6.11221 | -3.64499 | 0.394309 |
| C                | -7.42669 | 4.629558 | 0.467562 |
| C                | -7.07486 | 6.045374 | -1.98877 |
| H                | -7.53397 | 4.07775  | 1.396554 |
| H                | -6.91278 | 6.57416  | -2.92298 |
| S                | -4.94995 | 8.806731 | -1.53953 |
| C                | -4.56243 | 8.937827 | 1.043349 |
| H                | -4.11091 | 9.190192 | 1.99936  |
| C                | -4.0947  | 9.457907 | -0.15252 |
| C                | -8.24102 | 1.002687 | -2.72208 |
| S                | -7.93531 | 1.219139 | -0.11335 |
| H                | -8.1221  | 0.57135  | -3.71577 |
| C                | -8.06015 | 0.222724 | -1.55858 |
| C                | -4.14308 | -4.10868 | -2.65807 |
| S                | -2.88421 | -4.15124 | -3.87909 |
| C                | -3.70209 | -4.58347 | -1.43225 |

|   |          |          |          |
|---|----------|----------|----------|
| C | -1.74029 | -4.71541 | -2.72186 |
| C | -2.33279 | -4.89963 | -1.47758 |
| H | -4.33943 | -4.58895 | -0.5514  |
| C | -0.31561 | -4.79743 | -2.71876 |
| S | -1.15799 | -5.25099 | -0.23589 |
| C | 0.149546 | -5.00837 | -1.38612 |
| C | 0.597029 | -4.56678 | -3.75401 |
| C | 1.489266 | -4.88255 | -1.05989 |
| C | 1.936817 | -4.44269 | -3.42791 |
| H | 0.251283 | -4.41847 | -4.77246 |
| C | 2.387493 | -4.54278 | -2.07761 |
| H | 1.827316 | -4.97337 | -0.03214 |
| S | 3.214472 | -3.97853 | -4.54317 |
| C | 3.744471 | -4.10768 | -1.99248 |
| C | 4.311916 | -3.74326 | -3.20751 |
| S | 4.756922 | -3.65837 | -0.67395 |
| C | 5.556329 | -3.0963  | -3.09898 |
| C | 5.916253 | -2.92977 | -1.77158 |
| H | 6.1308   | -2.66716 | -3.91439 |
| C | 6.90817  | -2.02549 | -1.27395 |
| C | 7.638133 | -1.06852 | -1.94986 |
| N | 7.054611 | -1.75794 | 0.083338 |
| C | 8.146219 | -0.11221 | -0.9905  |
| C | 7.612249 | -0.45042 | -3.26339 |
| C | 7.721629 | -0.56749 | 0.337244 |
| H | 6.718576 | -2.33644 | 0.839258 |
| C | 8.193819 | 1.138163 | -1.65945 |
| N | 8.00403  | 0.883659 | -2.9941  |
| O | 7.318078 | -0.85792 | -4.37076 |
| O | 7.892292 | -0.10168 | 1.466973 |
| H | 8.099018 | 1.558167 | -3.73913 |
| C | 8.153352 | 2.453938 | -1.11536 |
| S | 7.762695 | 3.819267 | -2.14871 |
| C | 8.096111 | 2.78679  | 0.232806 |
| C | 7.431056 | 4.800689 | -0.77596 |
| C | 7.667641 | 4.110816 | 0.410575 |
| H | 8.265328 | 2.058063 | 1.018872 |
| C | 6.763696 | 6.050142 | -0.61088 |
| S | 7.137856 | 5.007645 | 1.809982 |
| C | 6.464955 | 6.255213 | 0.769159 |
| C | 6.272252 | 6.935151 | -1.57785 |
| C | 5.609119 | 7.263184 | 1.180883 |
| C | 5.411686 | 7.937474 | -1.16716 |
| H | 6.503074 | 6.789094 | -2.62869 |
| C | 5.031145 | 8.079292 | 0.202179 |

|    |          |          |          |
|----|----------|----------|----------|
| H  | 5.33077  | 7.371336 | 2.224646 |
| S  | 4.534092 | 9.022611 | -2.23608 |
| C  | 3.942759 | 8.996401 | 0.30501  |
| C  | 3.535255 | 9.54615  | -0.90456 |
| S  | 2.813271 | 9.347465 | 1.558204 |
| C  | 2.312406 | 10.23963 | -0.84878 |
| C  | 1.765994 | 10.17941 | 0.422926 |
| H  | 1.774419 | 10.67038 | -1.68912 |
| C  | 0.400749 | 10.44451 | 0.761174 |
| C  | -0.66331 | 10.69273 | -0.09061 |
| N  | -0.13666 | 10.1707  | 2.007145 |
| C  | -1.86985 | 10.40475 | 0.608843 |
| C  | -0.95066 | 10.75236 | -1.51508 |
| C  | -1.5442  | 10.07178 | 1.986409 |
| H  | 0.386007 | 9.982285 | 2.848451 |
| C  | -2.86667 | 10.17209 | -0.32545 |
| N  | -2.3332  | 10.47354 | -1.56676 |
| O  | -0.25739 | 10.96844 | -2.49526 |
| O  | -2.22368 | 9.76335  | 2.951591 |
| H  | -2.8232  | 10.43094 | -2.44684 |
| Au | -13.5657 | -0.81907 | 0.706946 |
| Au | -13.0261 | 2.208172 | 1.536619 |
| Au | -12.3168 | 0.008424 | 3.19661  |
| Au | -15.0467 | 0.614737 | 2.737497 |
| Au | -15.2985 | 1.520892 | 0.038962 |
| Au | -12.6917 | 1.688439 | -1.16069 |
| Au | -10.9489 | 0.493492 | 0.700572 |
| Au | -13.8782 | -3.203   | -1.48787 |
| Au | -12.8851 | -3.62306 | 1.156619 |
| Au | -15.5849 | -2.89291 | 0.771594 |
| Au | -15.6883 | -1.06481 | -1.40291 |
| Au | -13.0645 | -0.75141 | -2.51395 |
| Au | -11.3692 | -2.12029 | -0.74689 |
| Au | -10.7633 | -1.98042 | 1.974677 |
| Au | -14.2423 | -2.09671 | 3.153302 |
| Au | -16.9669 | -0.50526 | 1.04521  |
| Au | -14.9948 | 1.293204 | -2.74604 |
| Au | -10.4915 | 0.192534 | -2.16256 |
| Au | 13.24427 | -0.18183 | -0.00895 |
| Au | 15.01301 | 0.950267 | 2.597478 |
| Au | 12.90489 | -0.83801 | 2.944431 |
| Au | 12.35361 | 1.767147 | 1.938285 |
| Au | 14.50441 | 2.458608 | 0.254327 |
| Au | 16.19082 | 0.17726  | 0.130861 |
| Au | 15.44476 | -1.73565 | 2.041174 |

|    |          |          |          |
|----|----------|----------|----------|
| Au | 12.25324 | -2.47835 | -1.82659 |
| Au | 11.60833 | -2.43169 | 0.889984 |
| Au | 10.54657 | -0.39164 | -0.80843 |
| Au | 12.61876 | 0.156128 | -2.77583 |
| Au | 14.88456 | -1.52696 | -2.09913 |
| Au | 14.17677 | -3.34292 | -0.02939 |
| Au | 13.45422 | -3.59852 | 2.673866 |
| Au | 10.36747 | -0.20422 | 2.116666 |
| Au | 11.91608 | 2.159047 | -0.87261 |
| Au | 15.12069 | 1.266083 | -2.20229 |
| Au | 16.83325 | -2.49469 | -0.28792 |

| <b>DTBDT-BT</b> |          |          |          |
|-----------------|----------|----------|----------|
| <b>AU-MC</b>    |          |          |          |
| C               | 5.165744 | 2.935708 | -0.54498 |
| C               | 5.030313 | 2.257501 | 0.649814 |
| S               | 5.30161  | 1.831424 | -1.91072 |
| C               | 4.919422 | 0.828273 | 0.524102 |
| C               | 4.86901  | 0.468422 | -0.8525  |
| C               | 4.073091 | -1.34011 | 1.064593 |
| C               | 3.840299 | -1.61096 | -0.31462 |
| S               | 3.3273   | -2.5294  | 2.121618 |
| C               | 2.88661  | -2.66989 | -0.44619 |
| C               | 2.474413 | -3.21256 | 0.758579 |
| C               | 4.605627 | -0.12994 | 1.491914 |
| C               | 4.335593 | -0.72853 | -1.28664 |
| H               | 4.657925 | 0.114596 | 2.548151 |
| H               | 4.204845 | -0.93701 | -2.34382 |
| S               | 1.770403 | -3.06407 | -1.70896 |
| C               | 1.25305  | -3.91901 | 0.692654 |
| H               | 0.726567 | -4.33365 | 1.541898 |
| C               | 0.685827 | -3.85174 | -0.5652  |
| C               | 4.824266 | 4.303123 | -0.49777 |
| S               | 4.508378 | 3.334066 | 1.893469 |
| H               | 4.783931 | 4.970139 | -1.34851 |
| C               | 4.354493 | 4.665402 | 0.751039 |
| C               | -0.68375 | 6.853448 | 0.726803 |
| S               | -1.77329 | 6.078653 | 1.874925 |
| C               | -1.24842 | 6.911345 | -0.53245 |
| C               | -2.89005 | 5.679485 | 0.613699 |
| C               | -2.47304 | 6.210255 | -0.59434 |
| H               | -0.71864 | 7.315642 | -1.38459 |
| C               | -3.84466 | 4.620199 | 0.488417 |

|    |          |          |          |
|----|----------|----------|----------|
| S  | -3.32295 | 5.516703 | -1.95426 |
| C  | -4.07173 | 4.335823 | -0.88912 |
| C  | -4.33942 | 3.744033 | 1.465775 |
| C  | -4.59512 | 3.118911 | -1.30716 |
| C  | -4.86849 | 2.541036 | 1.040438 |
| H  | -4.20263 | 3.956877 | 2.521447 |
| C  | -4.90571 | 2.168201 | -0.33263 |
| H  | -4.6349  | 2.861783 | -2.36105 |
| S  | -5.25424 | 1.175956 | 2.11271  |
| C  | -4.99195 | 0.737396 | -0.44592 |
| C  | -5.09466 | 0.065925 | 0.754546 |
| S  | -4.53647 | -0.35335 | -1.70249 |
| C  | -4.77798 | -1.3073  | 0.704003 |
| C  | -4.35008 | -1.67999 | -0.55758 |
| H  | -4.71828 | -1.96927 | 1.557353 |
| C  | 1.694183 | 7.248379 | -0.01447 |
| C  | 3.024104 | 6.666807 | -0.00991 |
| C  | 3.421929 | 5.74988  | 1.023944 |
| C  | 2.593949 | 5.752501 | 2.135387 |
| C  | 1.299777 | 6.316419 | 2.130164 |
| C  | 0.742458 | 6.917104 | 1.012063 |
| H  | 2.84809  | 5.131651 | 2.989889 |
| H  | 0.66436  | 6.079137 | 2.978506 |
| N  | 3.750515 | 7.022643 | -1.06614 |
| N  | 1.468331 | 8.018856 | -1.07512 |
| S  | 2.828912 | 8.015743 | -1.96713 |
| C  | -3.42326 | -2.76425 | -0.84777 |
| C  | -2.59703 | -2.7526  | -1.96102 |
| C  | -3.02243 | -3.6926  | 0.17459  |
| C  | -1.30136 | -3.31273 | -1.96292 |
| H  | -2.85191 | -2.11969 | -2.80629 |
| C  | -1.69038 | -4.26873 | 0.172469 |
| C  | -0.7403  | -3.92069 | -0.85035 |
| H  | -0.66781 | -3.06495 | -2.80964 |
| N  | -3.74604 | -4.06053 | 1.228202 |
| N  | -1.46261 | -5.05281 | 1.222596 |
| S  | -2.8236  | -5.06667 | 2.113941 |
| Au | 11.15067 | -0.45947 | 0.232551 |
| Au | 9.601553 | 1.054352 | 2.6481   |
| Au | 8.173235 | -0.13672 | 0.546477 |
| Au | 9.611785 | 2.246747 | 0.13988  |
| Au | 12.0541  | 1.960562 | 1.624952 |
| Au | 11.97508 | -0.53423 | 3.013146 |
| Au | 9.505045 | -1.7536  | 2.488727 |
| Au | 11.74665 | -1.2055  | -2.98897 |

|    |          |          |          |
|----|----------|----------|----------|
| Au | 9.12464  | -1.15406 | -1.96294 |
| Au | 10.5497  | 1.234259 | -2.33279 |
| Au | 13.22757 | 0.68992  | -1.52443 |
| Au | 13.3895  | -2.02889 | -0.74398 |
| Au | 10.90281 | -3.22216 | -1.20363 |
| Au | 8.489058 | -2.88556 | 0.145585 |
| Au | 7.825062 | 1.369488 | -1.90344 |
| Au | 12.04788 | 3.15562  | -0.92241 |
| Au | 13.96579 | -0.01836 | 1.098502 |
| Au | 11.82771 | -2.94574 | 1.450504 |
| Au | -12.5916 | -1.38244 | -2.02753 |
| Au | -12.5404 | 1.111507 | 2.744719 |
| Au | -13.4161 | -0.19501 | 0.36243  |
| Au | -12.8657 | 2.633274 | 0.485947 |
| Au | -10.2668 | 2.183308 | 1.388674 |
| Au | -10.0832 | -0.33962 | 2.654918 |
| Au | -12.5563 | -1.62754 | 2.700722 |
| Au | -8.16445 | -1.10852 | -2.12553 |
| Au | -10.4732 | -2.09699 | -3.67739 |
| Au | -10.4677 | 0.471534 | -2.64251 |
| Au | -8.58725 | 1.201053 | -0.65017 |
| Au | -8.353   | -1.30645 | 0.648396 |
| Au | -10.2347 | -2.66522 | -0.97993 |
| Au | -12.737  | -2.94324 | 0.239028 |
| Au | -13.053  | 1.334475 | -1.98799 |
| Au | -10.7105 | 2.882681 | -1.30437 |
| Au | -7.81001 | 1.142356 | 2.111777 |
| Au | -10.2782 | -2.99259 | 1.764488 |

**Table S4. Optimized Cartesian coordinates of the gold clusters**

| <b>G1-Au6-Octahedron</b> |          |         |          |
|--------------------------|----------|---------|----------|
| Au                       | 0        | 1.38045 | 0        |
| Au                       | 0        | 0       | 2.364032 |
| Au                       | 2.364032 | 0       | 0        |
| Au                       | 0        | -       | 0        |
| Au                       | 0        | 1.38045 | 0        |
| Au                       | 0        | 0       | -2.36403 |
| Au                       | -2.36403 | 0       | 0        |

| <b>G1-Au7-Pentagonal Decahedron</b> |          |          |          |
|-------------------------------------|----------|----------|----------|
| Au                                  | 0        | 1.523052 | 0        |
| Au                                  | 0        | -1.52305 | 0        |
| Au                                  | 0        | 0        | 2.389077 |
| Au                                  | -2.27215 | 0        | 0.738265 |
| Au                                  | -1.40426 | 0        | -1.9328  |
| Au                                  | 1.404264 | 0        | -1.9328  |
| Au                                  | 2.272147 | 0        | 0.738265 |

| <b>G1-Au13-cubotahedron</b> |          |          |          |
|-----------------------------|----------|----------|----------|
| Au                          | 0        | 2.116195 | 0        |
| Au                          | 0        | 0        | 2.116195 |
| Au                          | 2.116195 | 0        | 0        |
| Au                          | 0        | -2.1162  | 0        |
| Au                          | 0        | 0        | -2.1162  |
| Au                          | -2.1162  | 0        | 0        |
| Au                          | 1.951774 | 1.951774 | 1.951774 |
| Au                          | -1.95177 | 1.951774 | 1.951774 |
| Au                          | 1.951774 | -1.95177 | 1.951774 |
| Au                          | 1.951774 | 1.951774 | -1.95177 |
| Au                          | -1.95177 | -1.95177 | -1.95177 |
| Au                          | 1.951774 | -1.95177 | -1.95177 |
| Au                          | -1.95177 | 1.951774 | -1.95177 |
| Au                          | -1.95177 | -1.95177 | 1.951774 |

| <b>G1-Au14-Cube</b> |          |          |          |
|---------------------|----------|----------|----------|
| Au                  | 0        | 2.116195 | 0        |
| Au                  | 0        | 0        | 2.116195 |
| Au                  | 2.116195 | 0        | 0        |
| Au                  | 0        | -2.1162  | 0        |
| Au                  | 0        | 0        | -2.1162  |
| Au                  | -2.1162  | 0        | 0        |
| Au                  | 1.951774 | 1.951774 | 1.951774 |
| Au                  | -1.95177 | 1.951774 | 1.951774 |

|    |          |          |          |
|----|----------|----------|----------|
| Au | 1.951774 | -1.95177 | 1.951774 |
| Au | 1.951774 | 1.951774 | -1.95177 |
| Au | -1.95177 | -1.95177 | -1.95177 |
| Au | 1.951774 | -1.95177 | -1.95177 |
| Au | -1.95177 | 1.951774 | -1.95177 |
| Au | -1.95177 | -1.95177 | 1.951774 |

| <b>G1-Au18-Marksüf Decahedron</b> |          |          |          |
|-----------------------------------|----------|----------|----------|
| Au                                | 0        | 0        | 0        |
| Au                                | 0        | 2.995704 | 0        |
| Au                                | -4.9E-05 | 1.595283 | 2.439883 |
| Au                                | -2.32048 | 1.595283 | 0.753918 |
| Au                                | -1.43409 | 1.595283 | -1.97394 |
| Au                                | 1.434167 | 1.595283 | -1.97388 |
| Au                                | 2.320451 | 1.595283 | 0.754012 |
| Au                                | 0        | -2.9957  | 0        |
| Au                                | -4.9E-05 | -1.59528 | 2.439883 |
| Au                                | -2.32048 | -1.59528 | 0.753918 |
| Au                                | -1.43409 | -1.59528 | -1.97394 |
| Au                                | 1.434167 | -1.59528 | -1.97388 |
| Au                                | 2.320451 | -1.59528 | 0.754012 |
| Au                                | 2.22627  | 0        | 3.064095 |
| Au                                | -2.22617 | 0        | 3.064166 |
| Au                                | -3.60212 | 0        | -1.17034 |
| Au                                | -6.1E-05 | 0        | -3.78747 |
| Au                                | 3.602083 | 0        | -1.17045 |

| <b>G2-Au19-Octahedron</b> |          |          |          |
|---------------------------|----------|----------|----------|
| Au                        | 0        | 0        | 0        |
| Au                        | 2.072105 | 2.072535 | 0        |
| Au                        | 0        | 2.072535 | 2.072105 |
| Au                        | -2.07211 | 2.072535 | 0        |
| Au                        | 0        | 2.072535 | -2.07211 |
| Au                        | 2.071086 | 0        | 2.071086 |
| Au                        | -2.07109 | 0        | 2.071086 |
| Au                        | -2.07109 | 0        | -2.07109 |
| Au                        | 2.071086 | 0        | -2.07109 |
| Au                        | -2.07211 | -2.07254 | 0        |
| Au                        | 0        | -2.07254 | -2.07211 |
| Au                        | 2.072105 | -2.07254 | 0        |
| Au                        | 0        | -2.07254 | 2.072105 |
| Au                        | 0        | 3.913992 | 0        |
| Au                        | 0        | 0        | 3.914799 |
| Au                        | 3.914799 | 0        | 0        |
| Au                        | 0        | -3.91399 | 0        |

|    |         |   |         |
|----|---------|---|---------|
| Au | 0       | 0 | -3.9148 |
| Au | -3.9148 | 0 | 0       |

| <b>G1-Au13-Icosahedron</b> |          |          |          |
|----------------------------|----------|----------|----------|
| Au                         | 0        | 0        | 0.382639 |
| Au                         | 0        | 2.875212 | 0.468753 |
| Au                         | 0        | 3.754497 | -2.06038 |
| Au                         | 1.447011 | 1.344393 | -1.6456  |
| Au                         | 1.441362 | 1.408821 | 2.345757 |
| Au                         | -1.44136 | 1.408821 | 2.345757 |
| Au                         | -1.44701 | 1.344393 | -1.6456  |
| Au                         | 0        | -2.87521 | 0.468753 |
| Au                         | 0        | -3.7545  | -2.06038 |
| Au                         | 1.447011 | -1.34439 | -1.6456  |
| Au                         | 1.441362 | -1.40882 | 2.345757 |
| Au                         | -1.44136 | -1.40882 | 2.345757 |
| Au                         | -1.44701 | -1.34439 | -1.6456  |

## References

- [1] S. Haseena, M. K. Ravva, *Sci. Rep.* **2022**, *12*, 1.
- [2] P. V. Nhat, N. T. Si, A. Fielicke, V. G. Kiselev, M. T. Nguyen, *Phys. Chem. Chem. Phys.* **2023**, *25*, 9036.
- [3] P. Lapham, L. Vilà-Nadal, L. Cronin, V. P. Georgiev, *J. Phys. Chem. C* **2021**, *125*, 3599.
- [4] Y. Jiang, Y. Wang, S. Sanvito, S. Hou, *J. Phys. Chem. C* **2022**, *126*, 12424.
- [5] D. A. Egger, Z. Liu, L. Kronik, **2015**, DOI 10.1021/nl504863r.
- [6] A. Khalid, R. A. Khera, A. Saeed, M. Khalid, S. Iqbal, J. Iqbal, *Optik (Stuttg)*. **2021**, *228*, 1.
